# Supplementary material for: Travel-related Twenty-eight Days Cyclical Thrombosis and Subgroups of COVID-19 Cardiac Biomarker Data: Novel Review Strategy and Meta-analysis Method
Source: bioRxiv or medRxiv preprint supplement (doi:10.1101/2022.06.06.22275944), 2023-08-25
Supplement: Supplementary file [file media-1.pdf]

1 **Supporting Information**

2 **Supporting Information for**

3 **Travel-related Twenty-eight Days Cyclical Thrombosis and Subgroups of COVID-19 Cardiac**

4 **Biomarker Data: Novel Review Strategy and Meta-analysis Method**

5  
6 Corresponding author: Keiichiro Kimoto

7 E-mail: k1974142@kadai.jp

8 Department of Laboratory and Vascular Medicine,

9 Kagoshima University, Graduate School of Medical and Dental Sciences,

10 8-35-1 Sakuragaoka, Kagoshima 890-8520, Japan.

11 Phone: /Fax: +81-99-275-5437/+81-99-275-2629

12  
13 This PDF file includes:

14 Supporting figures & figure legends (Figures S1 to S15)

15 Supporting tables & table legends (Tables S1 to S3)

16 Method details

17 Supplementary discussions

18 SI References

19  
20 **NOTE**

21 **Especially in the “Method details” section, we pointed out many overlooked information and**  
22 **errors. However, we have no intention to attack previous works because our analysis results**  
23 **owing to their original works, including original research articles, reported valuable data, and**  
24 **writings of meta-analysis synthesized valuable datasets. We highly respect previous works**  
25 **intending to solve medical issues.**

28

29 **1. Supporting figures & figure legends**

30 **Fig. S1.**

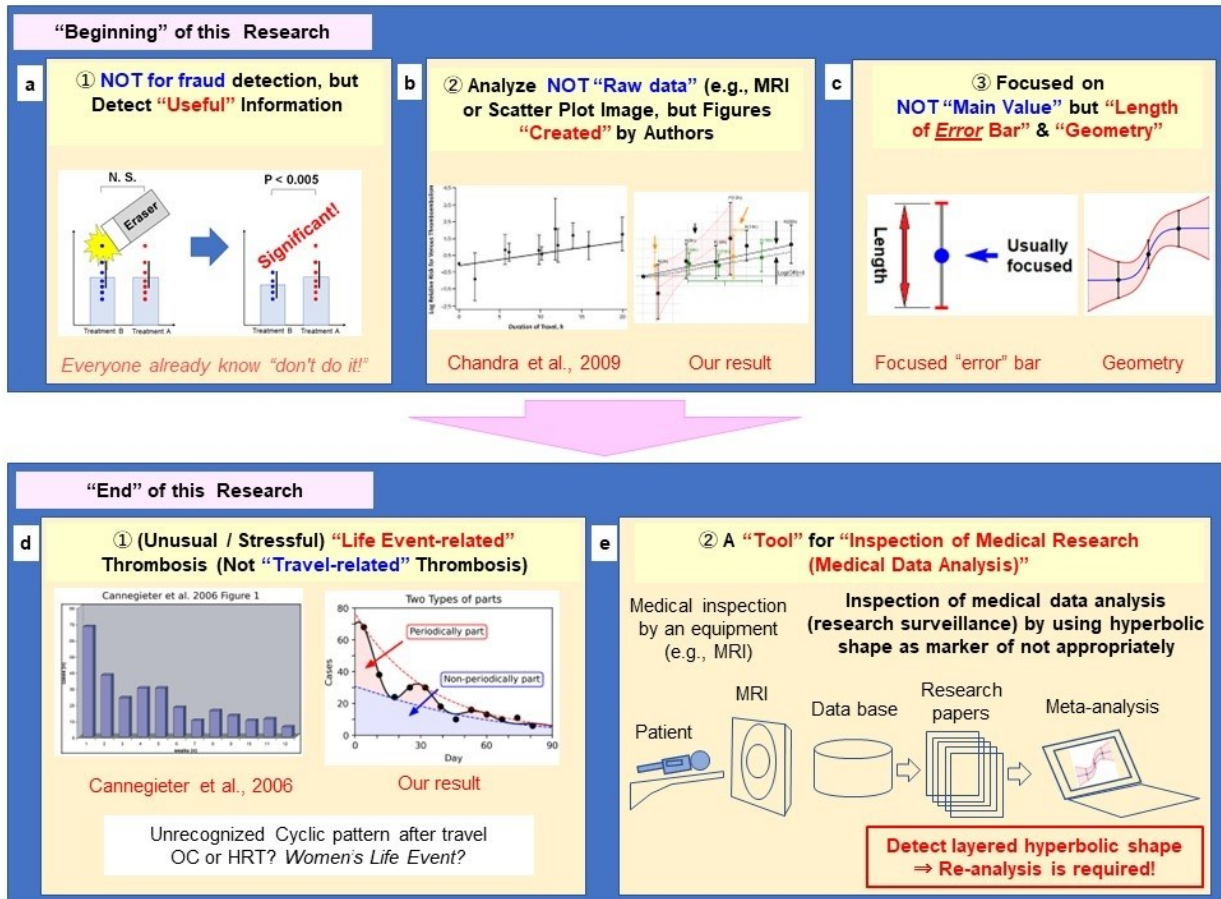

31

32 **Fig. S1. Illustration of our concepts at the beginning and the end of this study.**

33 **a**, Extracting does not research fraudulent but useful findings that had been missed. **b**, Finding latent  
 34 useful findings not from image data such as MRI or X-ray images (a kind of raw data) but from charts  
 35 created by each researcher. **c**, Finding latent useful findings from not value itself is usually interesting,  
 36 but a geometric consideration of the length of the error bars of the confidence intervals, which used to  
 37 evaluate the main value. **d**, a new concept, “life event-related thrombosis,” replacing the concept of  
 38 travel-related thrombosis. **e**, Monitoring whether clinical research society executes appropriate data  
 39 analysis, as an application of the subgroup search methodology proposed in this study. In panel b, on  
 40 those figures re-used and re-drawn are derived from Chandra D, Parisini E, Mozaffarian D. Meta-  
 41 analysis: travel and risk for venous thromboembolism. *Ann Intern Med.* 2009 Aug 4;151(3):180-90.

42 doi: 10.7326/0003-4819-151-3-200908040-00129. Epub 2009 Jul 6. © 2009 American College of  
43 Physicians. Adapted with permission. The original figure has been shown on the American College of  
44 Physicians website, which links to PubMed<sup>®</sup>(<https://pubmed.ncbi.nlm.nih.gov/19581633/>). In panel d,  
45 those figure are re-used or re- drowned from Cannegieter et al. *PLoS Med.* 2006; 3(8):e307. Figure 1.  
46 <https://www.ncbi.nlm.nih.gov/labs/pmc/articles/PMC1551914/figure/pmed-0030307-g001/> Copyright  
47 © 2006 Cannegieter et al. Creative Commons Attribution License. In 2006, the Creative Commons  
48 Attribution 2.0 Generic, License (CC BY 2.0) was available.  
49 <https://creativecommons.org/licenses/by/2.0/>

50

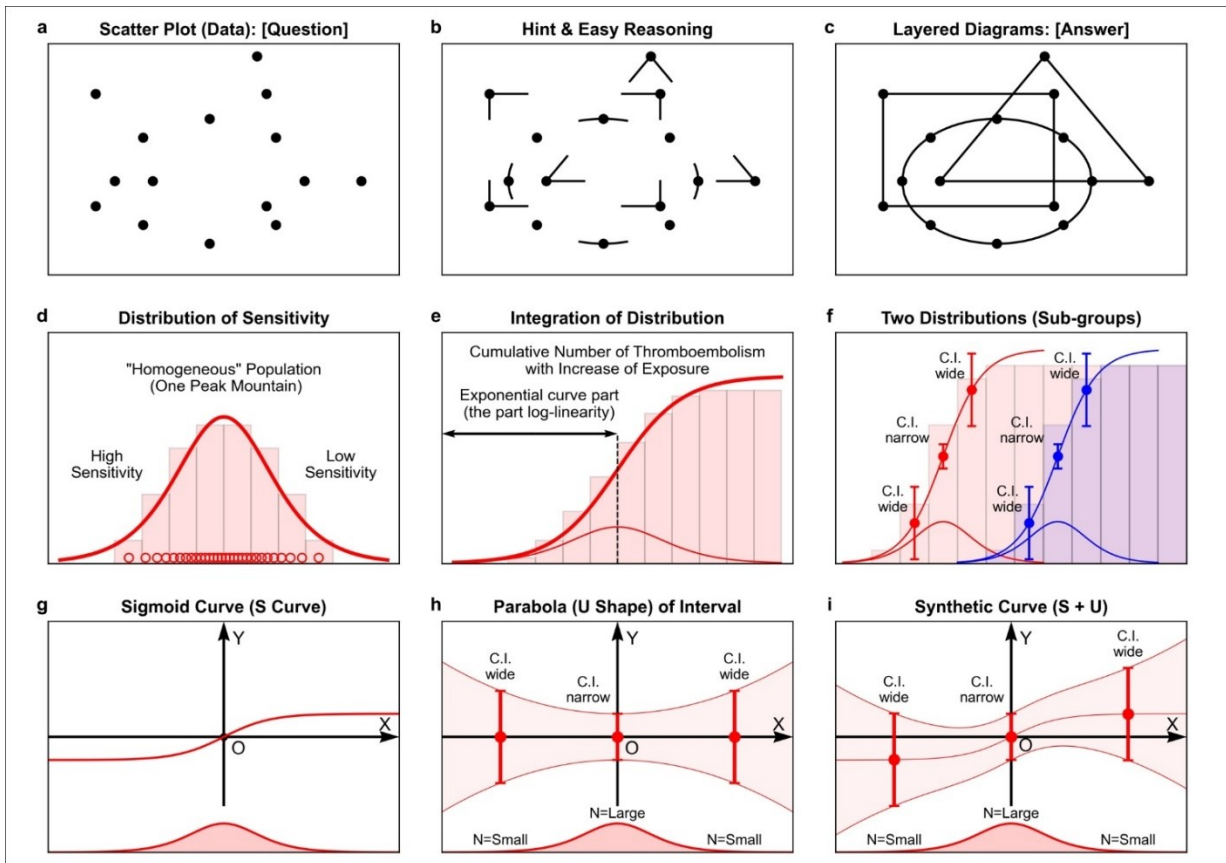

52

53 **Fig. S2. Finding shapes using a “key” to search and “latent patient population” onset with a strength**  
 54 **of risk.**

55 **a**, The apex points of the circle, triangle, and quadrilateral. **b**, The apex points with a part of the edge  
 56 close to the points. **c**, Complete shapes of triangles, quadrilaterals, and circles. **d**, Schematic  
 57 representation of a homogeneous latent patient population. **e**, Schematic representation of the  
 58 cumulative number of cases. **f**, Schematic depiction of two subgroups. **g**, A schematic representation  
 59 of the S-curve formed by the cumulative distribution. **h**, A schematic representation of the width of  
 60 the confidence interval. **i**, A schematic representation of S-curve plus width of the confidence interval.  
 61 Although it is difficult to find the overlapped shapes from the only apex points, it is easy to arrive at  
 62 the correct answer if we obtain some “key” or “hints” (panels a-c). Our idea, searching subgroups  
 63 focusing on the layered hyperbolic shape to find, is similar to finding latent patterns using some key  
 64 or hint. The number of cases increases with the integration of exposure to risk factors. There may be

65 two sub-group if there are two types of origin of S-curves in the x-axis that represent the strength of  
66 risk (panels d-f).

67

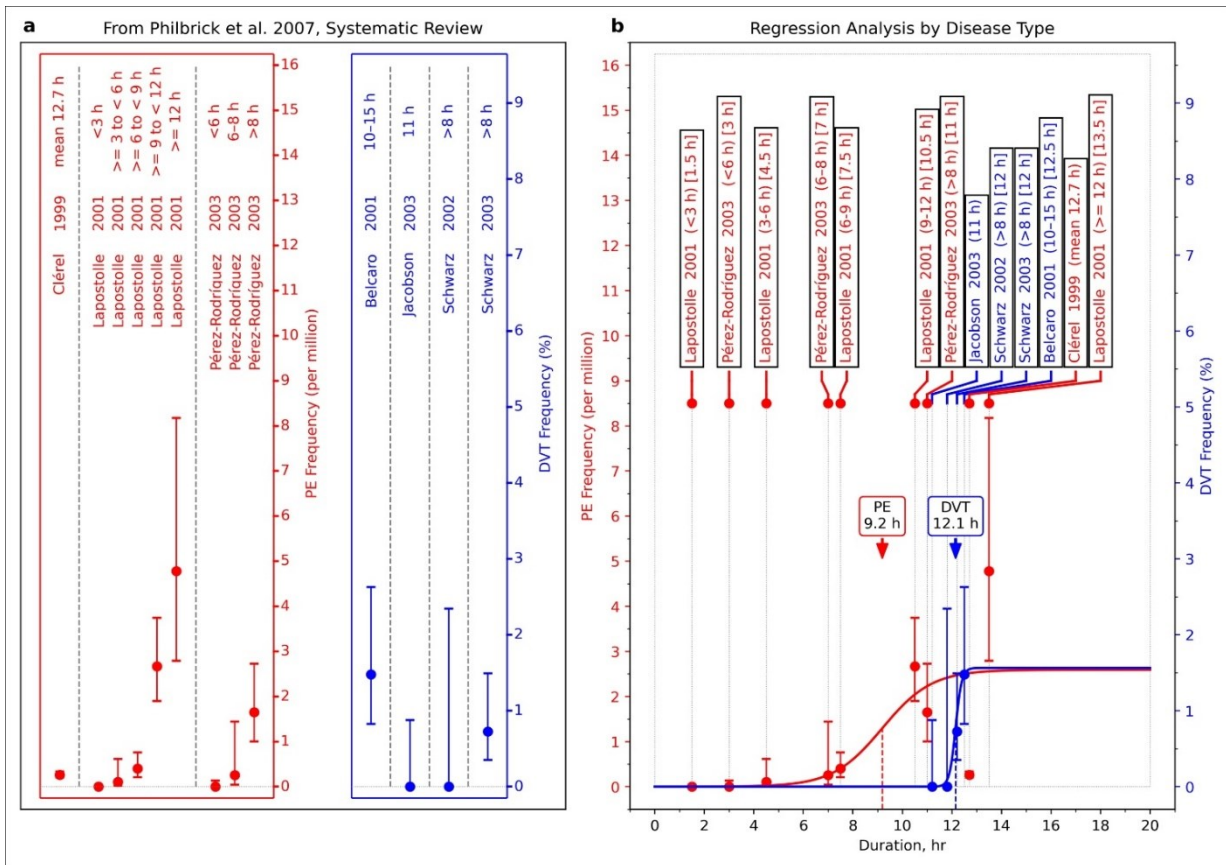

69

70 Fig. S3. Curve fitting to the dataset reported by Philbrick et al<sup>7</sup>.

71 a, Data stratification by Pulmonary Embolism (PE) and Deep Vein Thrombosis (DVT). b,  
 72 Application of S-shaped curve by regression analysis to the stratified data. The value in the bracket  
 73 (panel b) is the point of time converted from the time category (see **Supporting information:**  
 74 **Method details**). Philbrick et al<sup>7</sup> reported the result of a systematic review with a only table (list).

75

76

77 **Fig. S4.**

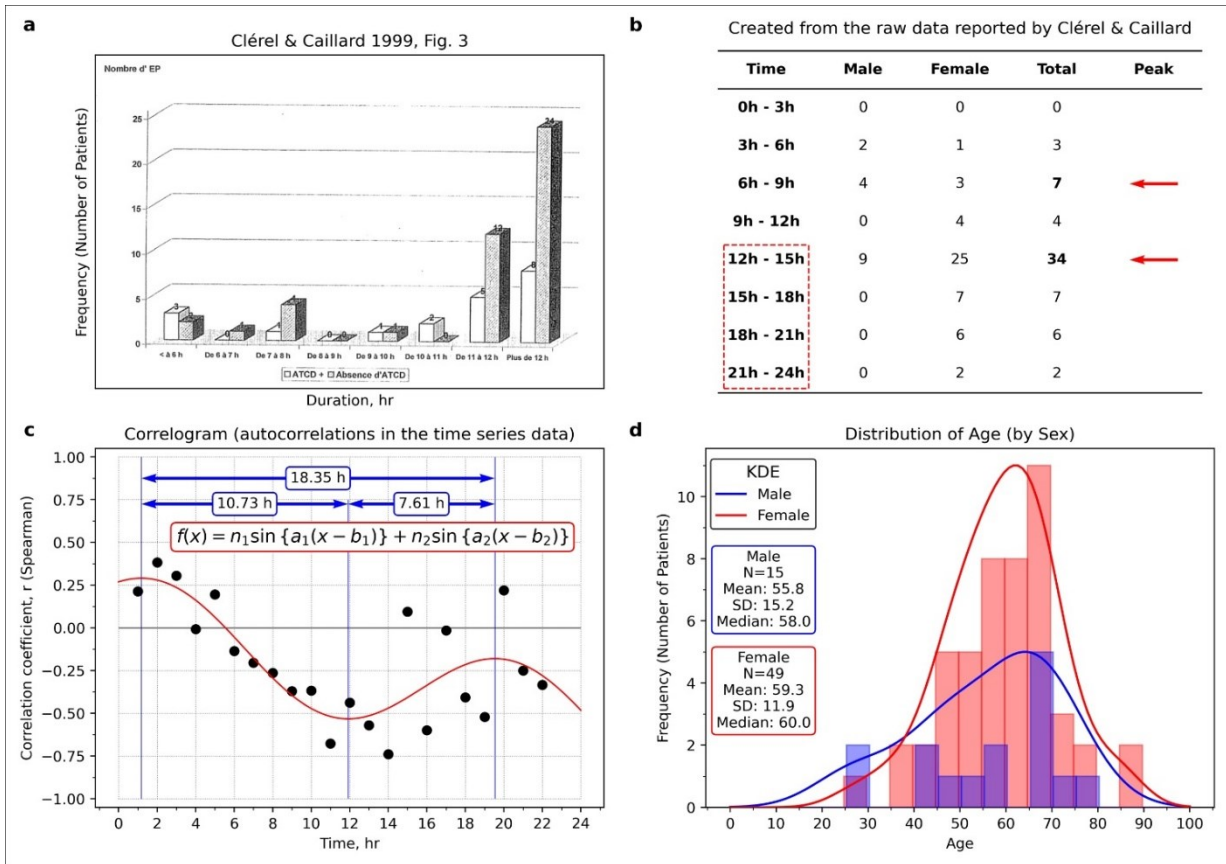

78

79 **Fig. S4. Re-analysis of the data in Table 1 reported by Clérel & Caillard<sup>27</sup>.**

80 **a**, A figure made by Clérel & Caillard<sup>27</sup> showed a relationship between travel time and the thrombosis

81 onset in the case of stratification by medical history of thrombosis. **b**, The relationship between time

82 and thrombosis (prepared from Table 1 reported by Clérel & Caillard<sup>27</sup>). **c**, Correlogram (prepared

83 from Table 1 reported by Clérel & Caillard<sup>27</sup>). **d**, Age distribution by sex (made from Table 1 reported

84 by Clérel & Caillard<sup>27</sup>). As shown in panel a, Clérel & Caillard<sup>27</sup> summarized all the data for 12 hours

85 or more, but there were two peaks (see panel b). In panel c, there was a periodic pattern. Panel a

86 reproduced from Clérel & Caillard. Syndrome thrombo-embolique de la station assise prolongée et

87 vols de longue durée: l'expérience du Service Médical d'Urgence d'Aéroports De Paris. *Bull Acad Natl*

88 *Med.* 1999; 183(5):985-997. discussion 997-1001. Figure 3. Copyright © 1999 Elsevier Masson SAS.

89 All rights reserved. Académie Nationale de Médecine.

90

91

92 **Fig. S5.**

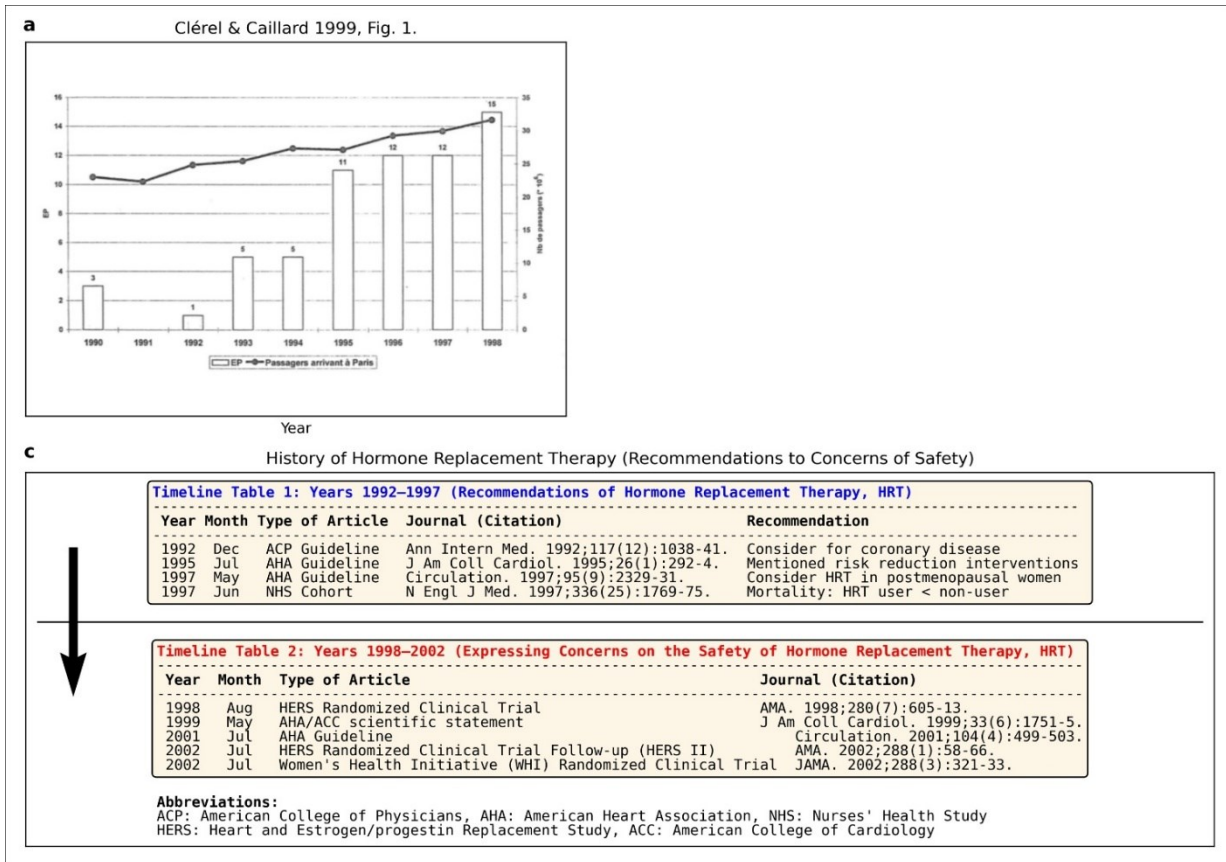

93

94 **Fig. S5. Thrombosis reported by Clérel & Caillard<sup>27</sup> & our novel annotations.**

95 **a**, Clérel & Caillard mentioned that “their incidence increases during the last years, corresponding to  
96 the growth of air traffic and mainly to the increase of long duration without stop flight.”<sup>27</sup> **c**,

97 Chronology of various guidelines on HRT. The HRT was recommended consideration for elder

98 women in the 1990s, but its effectiveness was questioned in the HERS trial (1998)<sup>31</sup>. Also, the risk

99 was discovered in the WHI trial at the interim analysis (2002)<sup>32</sup>. It might be the effect of the

100 publication on the HERS study (1998)<sup>31</sup> that the increase in thromboses was relatively small in 1998

101 despite the publication of two documents recommended in 1997. Panel a was reproduced from Clérel

102 & Caillard. Syndrome thrombo-embolique de la station assise prolongée et vols de longue durée:

103 l'expérience du Service Médical d'Urgence d'Aéroports De Paris. *Bull Acad Natl Med.* 1999;

104 183(5):985-997. discussion 997-1001. Figure 1. Copyright © 1999 Elsevier Masson SAS. All rights

105 reserved. Académie Nationale de Médecine.



106

107 **Fig. S6.**

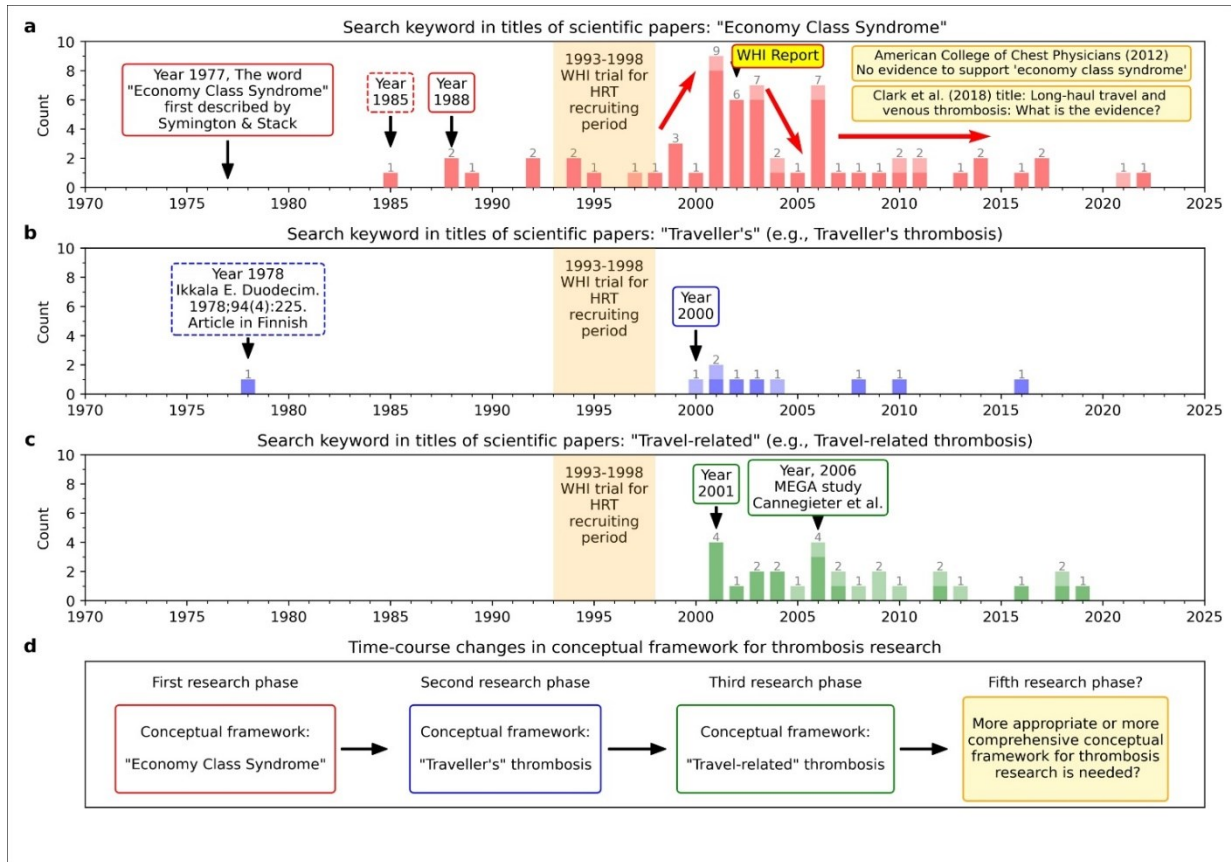

108

109 **Fig. S6. Visualized the change (trend) in the number of papers (trend analysis).**

110 **a**, Search results in the keyword "Traveler's thrombosis." **b**, Search results in the keyword "Traveler's

111 thrombosis" **c**, Search results with the keyword "Travel-related thrombosis". **d**, Flow of the concept's

112 transition history. The bar graphs are based on the date of the electronic version. If PubMed displayed

113 "Epub," we choose the date of electronic version was opened, even if another publication day was

114 described because the day of the electronic version is closer to the onset day. Light-colored bars

115 indicate the review or meta-analysis articles.

116

117

118 **Fig. S7.**

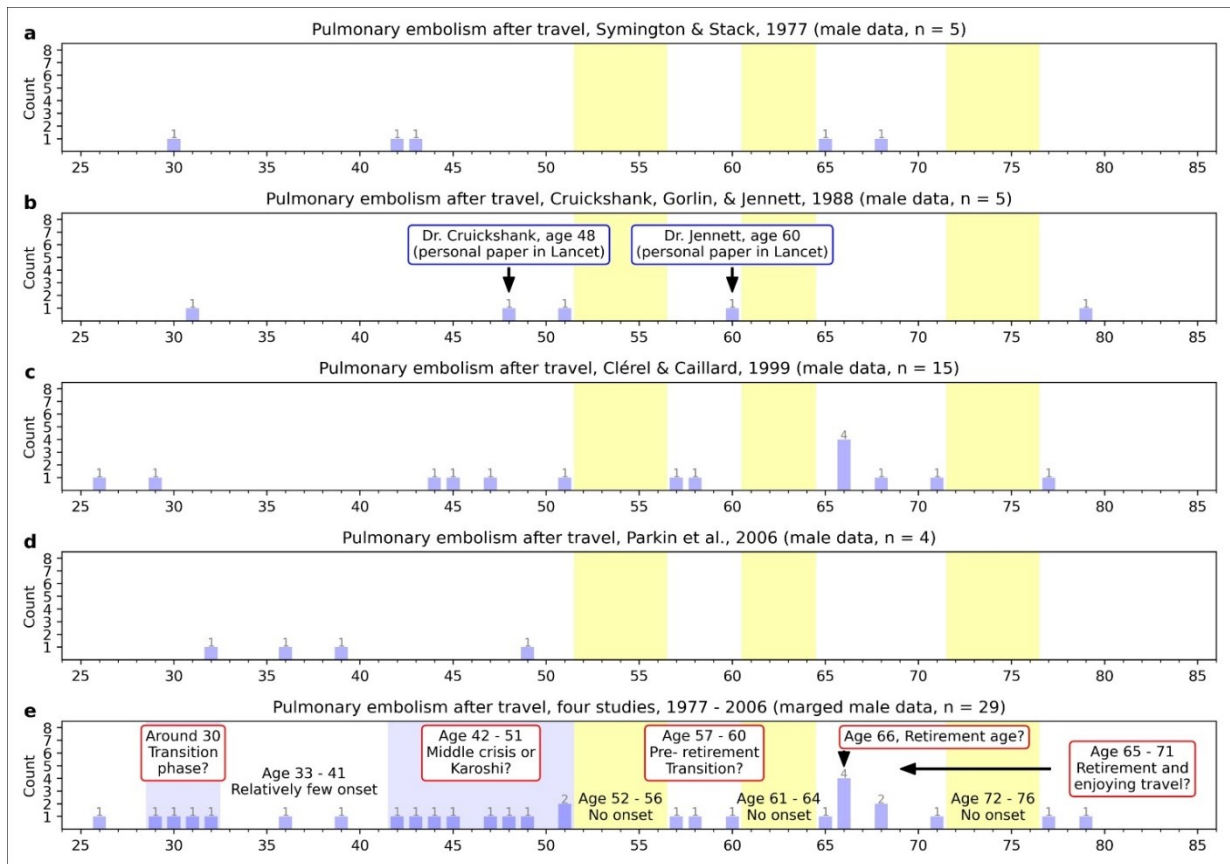

119

120 **Fig. S7. Displaying case data as a bar chart “by 1-year” after accumulating from several studies**  
121 **(male).**

122 **a**, Male data in Symington & Stack (1977)<sup>33</sup>. **b**, Male data in Cruickshank, Gorlin, & Jennett (1988)<sup>34</sup>.

123 **c**, Male data in Clérel & Caillard (1999)<sup>27</sup>. **d**, Male data in Parkin et al (2006)<sup>26</sup>. **e**, Merged data from

124 four studies<sup>26,27,33,34</sup>. Data on male cases extracted from articles on pulmonary embolism (PE) were

125 published from the 1970s to the 2000s. In psychology, the transition period which adolescence to

126 adulthood is around age 25. However, the study period is becoming longer with the increasing number

127 of college students. It may shift to around the age of 30. In the data of Clérel & Caillard (1999)<sup>27</sup>, four

128 cases were recorded at age 66. Regarding the retirement age being extended to 65, this may be a case

129 of a couple traveling to Paris after retirement.

130

131

132 **Fig. S8.**

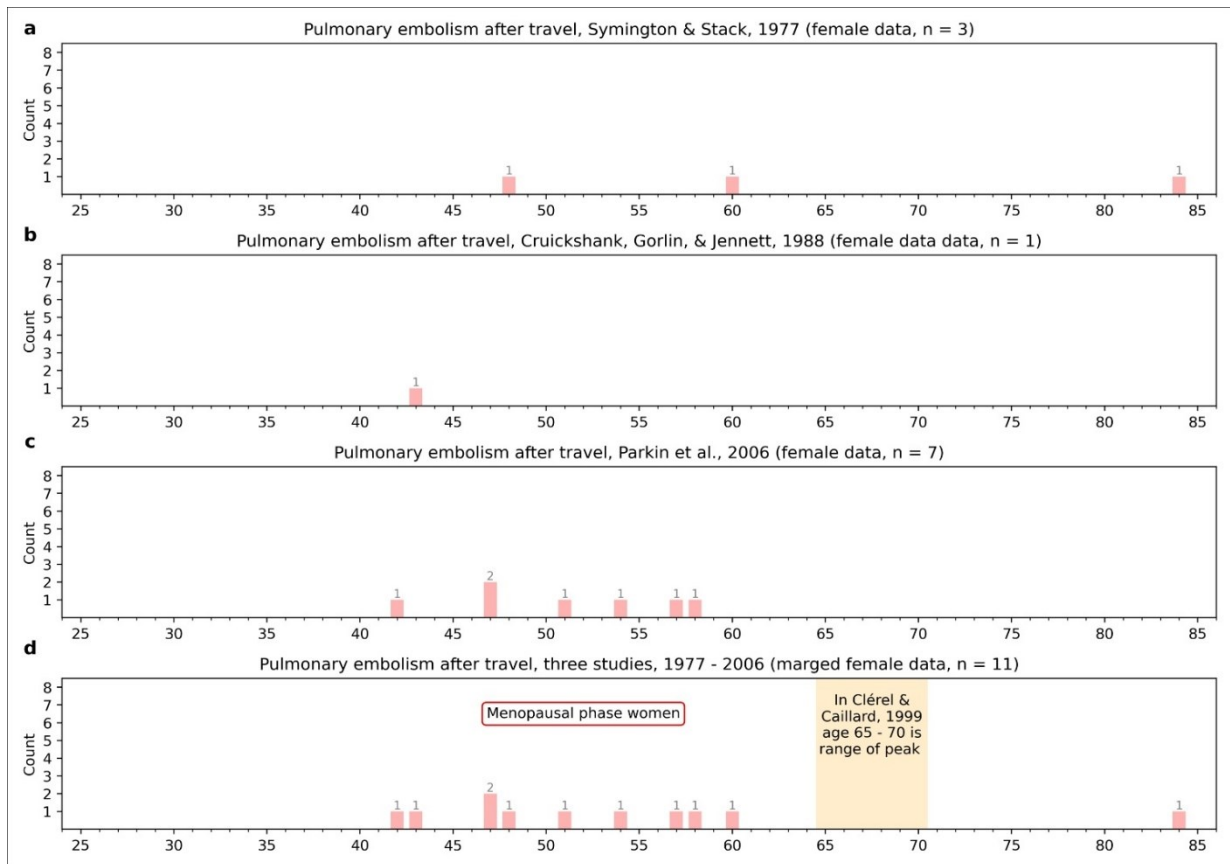

133

134 **Fig. S8. Displaying case data as a bar chart “by 1-year” after collecting from several studies**

135 **(female).**

136 **a**, Female data in Symington & Stack (1977)<sup>33</sup>. **b**, Female data in Cruickshank, Gorlin, & Jennett

137 (1988)<sup>34</sup>. **c**, Female data in Parkin et al (2006)<sup>26</sup>. **d**, Aggregated data from four studies. Data on female

138 cases extracted from articles on pulmonary embolism (PE) were published from the 1970s to the

139 2000s.

140

141

142 **Fig. S9.**

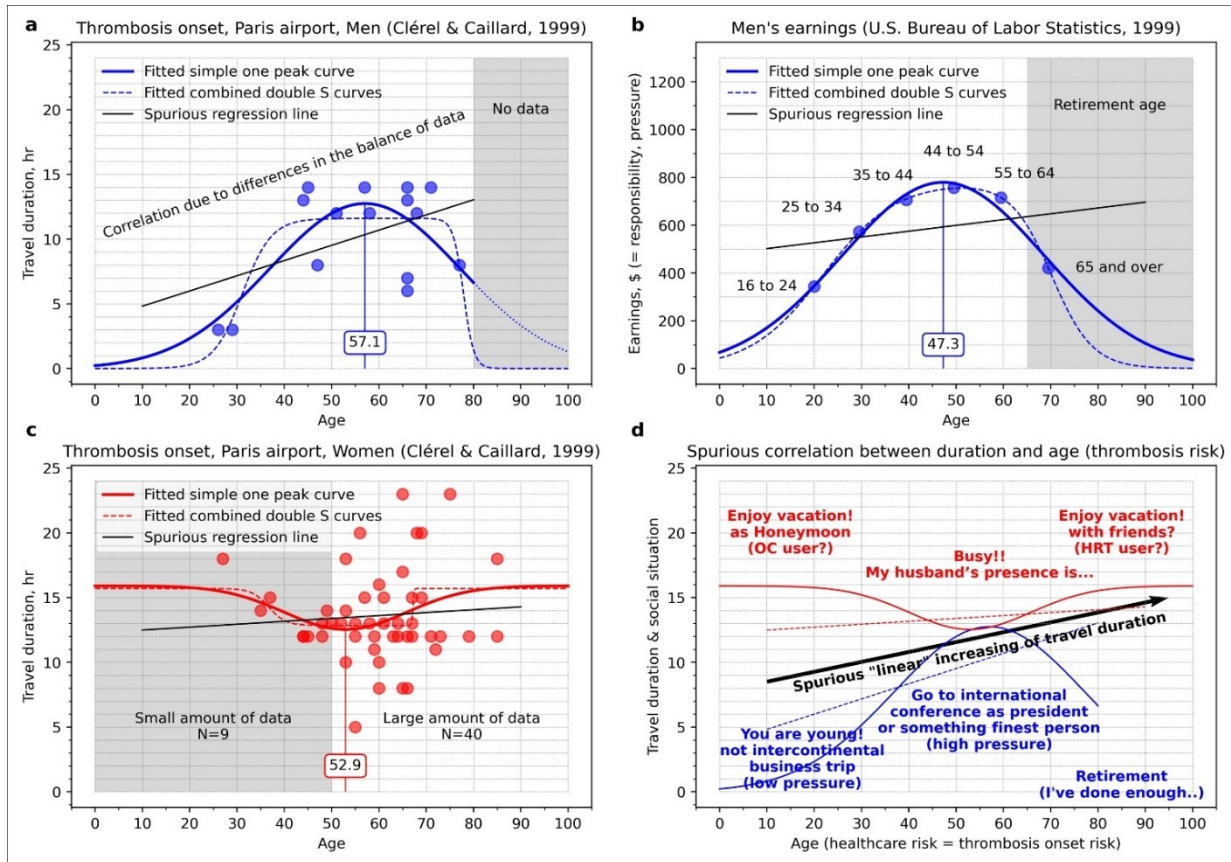

143

144 **Fig. S9. Relationship between age and travel duration in the data reported by Clérel & Caillard**  
145 **(1999).**

146 **a,** Scatterplot for the men's data included in the study reported by Clérel & Caillard (1999)<sup>27</sup>. Age on

147 the horizontal axis and air travel time on the vertical axis. The peak position was 57.1 years old. **b,**

148 Scatter plots of income in men in the United States (Bureau of Labor Statistics, U.S. Department of

149 Labor, The Economics Daily, Men's earnings at peak at age 45-54 at

150 <https://www.bls.gov/opub/ted/1999/jul/wk3/art05.htm>)<sup>51</sup>. Age is on the horizontal axis, and income is

151 on the vertical axis. The peak position was 47.3 years old. **c,** Scatter plots for women's data in the

152 study reported by Clérel & Caillard (1999)<sup>27</sup>. Age on the horizontal axis and air traveling time on the

153 vertical axis. The position of the valley of the U-shaped curve was 52.9 years old. **d,** Illustration of the

154 interpretation of the curves (inverted U-shape in men and U-shape in women) that are inverted each

155 other. In all panels, the solid line fits the same curve as the normal distribution. The dotted line fits

156 combined two S-shaped curves (curves represented by sigmoid functions). The difference between  
157 peak positions in an age (panels a and b) may be caused by the difference in data type. Air travel data  
158 may include a larger number of brain workers than income data due to the income data being for all  
159 men in the United States (e.g., peak is shifted to a later age for a more extended education period). In  
160 panel b, we have re-drawn the referenced material with reference to Section 105 of the U.S. Copyright  
161 Act and with confirmation that the referenced material is not copyrighted.

162

163

164 **Fig. S10.**

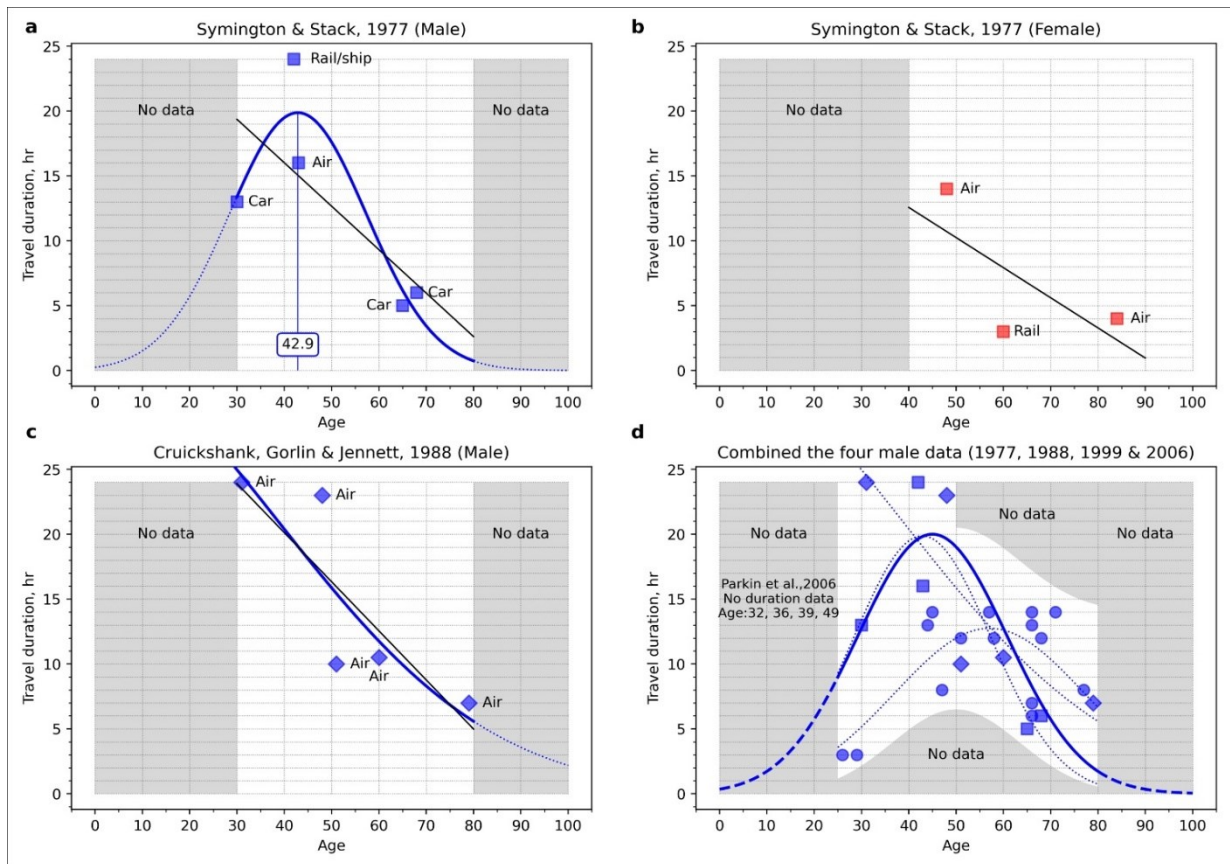

165

166 **Fig. S10. Relationship between age and duration in the data reported by four studies<sup>26,27,33,34</sup>.**

167 **a**, Extracting the data for male cases from Symington & Stack (1977)<sup>33</sup> and plotting them as age on

168 the horizontal axis and travel time on the vertical axis. **b**, Extracting the data for female cases from

169 Symington & Stack (1977)<sup>33</sup> and plotting them as age on the horizontal axis and travel time on the

170 vertical axis. **c**, Extracting the data for male cases from Cruickshank, Gorlin, & Jennett (1988)<sup>34</sup> and

171 plotting them as age on the horizontal axis and travel time on the vertical axis. **d**, Scatter plot of the

172 data from four studies data. The data from Parkin et al (2006)<sup>26</sup> did not include travel time, but age

173 information was described. The pattern in the scatterplot is not expected to change significantly. As

174 for the data for women, we cannot make a judgment due to the small number of cases, but we suspect

175 that the pattern may differ from that of Clérel & Caillard (1999)<sup>27</sup> for Paris airports (c.f. Fig. S9, c &

176 **d**).

177

178

179 **Fig. S11**

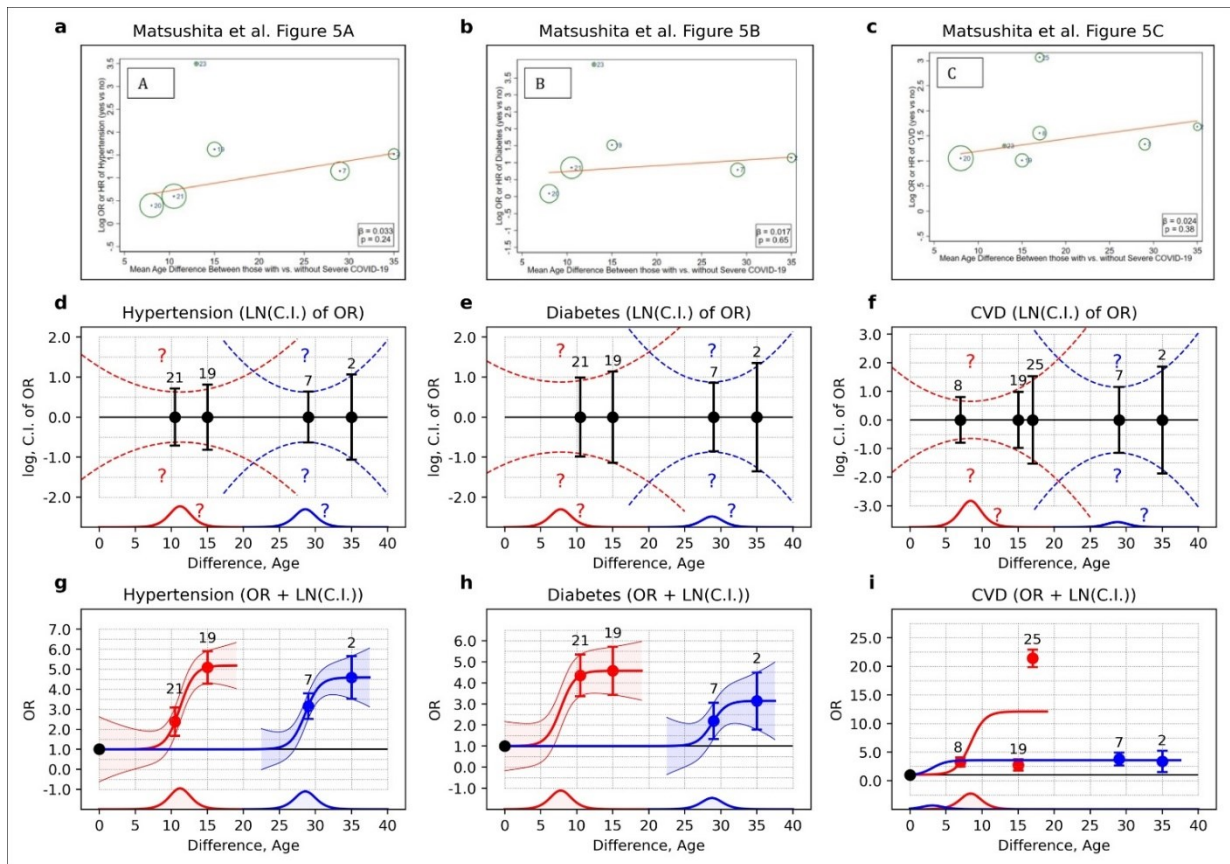

180

181 **Fig. S11. Hyperbolic shapes found in the figure reported by Matsushita et al<sup>36</sup>.**

182 **a**, A figure reported by Matsushita et al shows the relationship between the severe and non-severe  
183 groups<sup>36</sup>, which shows age difference on the horizontal axis and odds ratio (OR) or hazard ratio of

184 hypertension on the vertical axis. To evaluate potential confounding for relative risk by age,

185 Matsushita et al conducted meta-regression analyses based on the assumption that there was the

186 possibility of confounding by age in the case that the study with a larger age difference has a higher

187 relative risk<sup>36</sup>. **b**, Diabetes. **c**, Cardiovascular disease (CVD). **d-f**, Comparisons of error bars, which

188 show 95% confidence interval (C.I.) s. It corresponds to the upper figure. **g-i**, Hyperbolic patterns

189 were fitted to the OR and the 95% confidence limit of the OR. In the panel i, a hyperbolic shape could

190 not be fitted due to the considerable data variation, likely due to the inconsistency of the term “CVD”

191 (see **Supporting information: Method details**). The numbers marked at each point are the same as

192 the numbers shown in the original figure. The sources of each data are shown in Methods. This figure

193 was re-used from Matsushita et al. *Glob Heart*. 2020; 15(1):64. Figure 5.

194 <https://www.ncbi.nlm.nih.gov/labs/pmc/articles/PMC7546112/figure/F5/>

195 Copyright © 2020 The Authors. Creative Commons Attribution 4.0 International License (CC-BY

196 4.0) <https://creativecommons.org/licenses/by/4.0/>

197



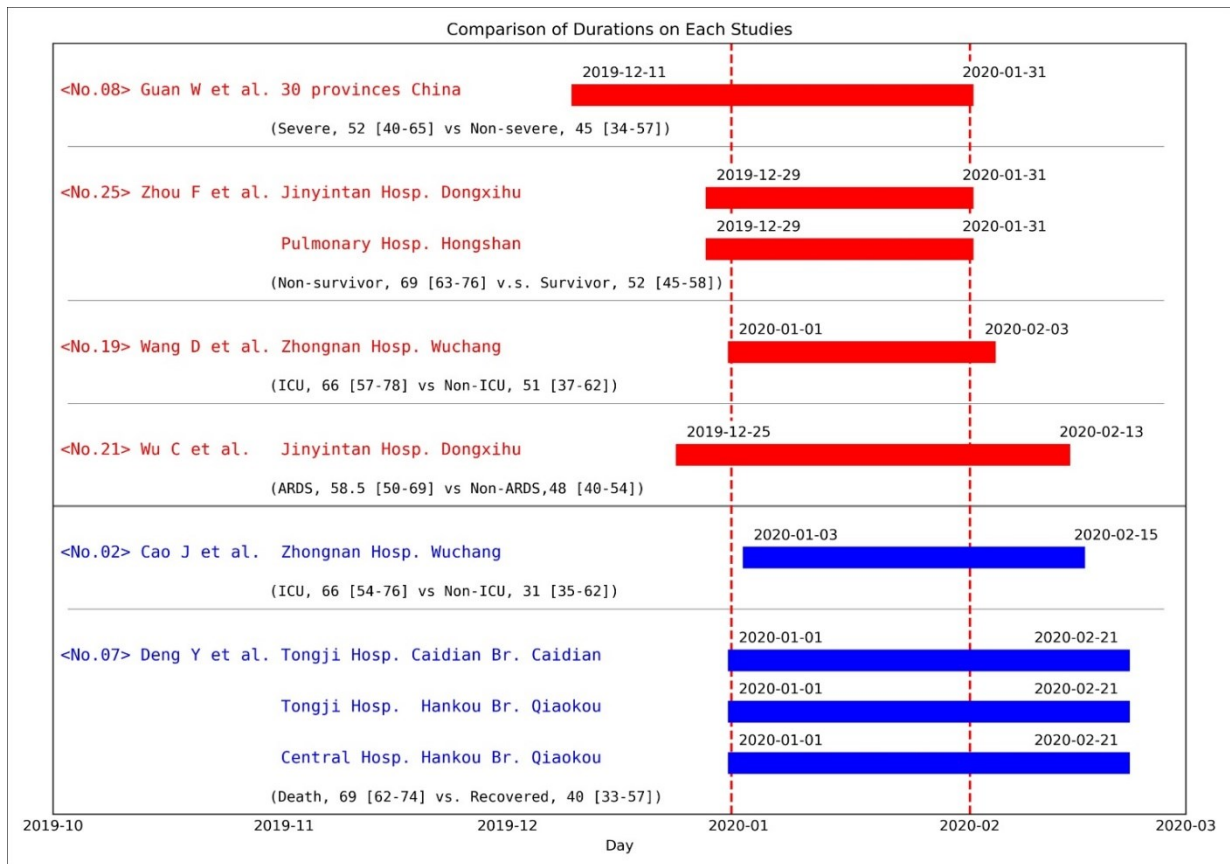

200

201 **Fig. S12. Data cut-off dates in each study cited by Matsushita et al<sup>36</sup>.**

202 The data acquisition period in each study was displayed in Gantt chart format. The date display format

203 is year-month-day. The correspondence between numbers and authors is as follows: No.2: Cao et al.

204 (Cao, J. et al., *Intensive Care Med.* 2020;46(5):851-853.)<sup>52</sup>, No.7: Deng et al (Deng, Y. et al., *Chin*205 *Med J (Engl).* 2020;133(11):1261-1267.)<sup>53</sup>, No.8: Guan et al (Guan, W.J. et al., *N Engl J Med.*206 2020;382(18):1708-1720.)<sup>54</sup>, No.19: Wang D. et al (Wang, D. et al., *JAMA.* 2020;323(11):1061-207 1069.)<sup>55</sup>, No.20: Wang L. et al (Wang, L. et al., *J Infect.* 2020;80(6):639-645.)<sup>56</sup>, No.21: Wu et al.208 (Wu, C. et al., *JAMA Intern Med.* 2020;180(7):934-943.)<sup>57</sup>, No.25: Zhou et al (Zhou, F. et al., *Lancet.*209 2020;395(10229):1054-1062.)<sup>58</sup>. Abbreviations: ARDS (Acute Respiratory Distress Syndrome), ICU

210 (Intensive Care Unit). The number in parentheses means median age. The number in the bracket

211 represents the standard deviation or interquartile range.

212

213 **Fig. S13.**

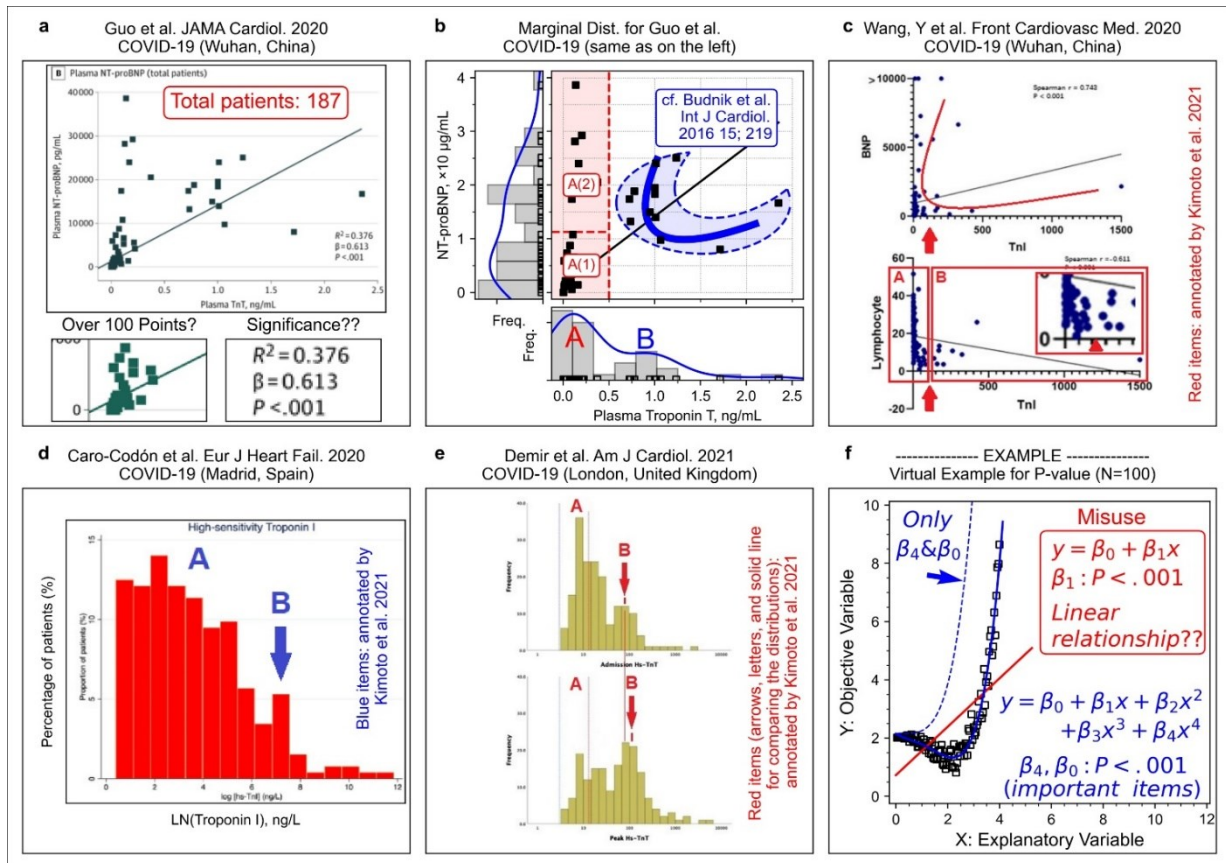

214

215 **Fig. S13. Bimodal distributions & tilted parabola in COVID-19 patients.**

216 **a**, Guo et al. *JAMA Cardiol.* 2020; 5(7):811-818. Figure 1B

217 <https://www.ncbi.nlm.nih.gov/labs/pmc/articles/PMC7101506/figure/hoi200026f1/>

218 Copyright © 2020 Guo T et al. *JAMA Cardiology.* Creative Commons Attribution License (CC-BY).

219 **b**, Marginal distribution of the scatter plot data. **c**, Wang et al. *Front Cardiovasc Med.* 2020; (7): 147.

220 Figure 1 (upper, x-axis: troponin I,  $\text{pg/mL}$ ; y-axis: BNP,  $\text{pg/mL}$ ; lower, x-axis: troponin I,  $\text{pg/mL}$ ; y-

221 axis: lymphocyte, %)<sup>39</sup>. <https://www.ncbi.nlm.nih.gov/labs/pmc/articles/PMC7477309/figure/F1/>

222 Copyright © 2020 Wang, Zheng, Tong, Wang, Lv, Xi and Liu. CC BY License. **d**, Caro-Codón et al.

223 *Eur J Heart Fail.* 2021; 23(3):456-464. Figure 1B (x-axis, LN (troponin I))<sup>42</sup>.

224 <https://www.ncbi.nlm.nih.gov/labs/pmc/articles/PMC8013330/figure/ejhf2095-fig-0001/>

225 Copyright © 2021 European Society of Cardiology. All rights reserved. This Figure can be used for

226 unrestricted research re-use and analysis in any form or by any means with acknowledgment of the

227 original source as part of the COVID-19 public health emergency, for the duration of the emergency.

228 e, Demir et al. *Am J Cardiol.* 2021; 147:129-136. Figure 2 (upper: admission; lower: peak  
229 measurements; x-axis: troponin T, ng/L)<sup>43</sup>.  
230 <https://www.ncbi.nlm.nih.gov/labs/pmc/articles/PMC7895690/figure/fig0002/>  
231 Copyright © 2021 Elsevier Inc. All rights reserved. This figure is granted for unrestricted research re-  
232 use and analyses in any form or by any means with acknowledgment of the original source by  
233 Elsevier for as long as the COVID-19 resource center remains active. **f**, Virtual example on regression  
234 analysis (**Supporting discussion 5: linear regression analysis**). In panel b (also c, d, and e), the  
235 histogram was bimodal (marked “A” and “B”). The crescent-shape pattern closely resembled the ST-  
236 segment elevation myocardial infarction group pattern that appeared in the study by Budnik et al<sup>38</sup>.  
237

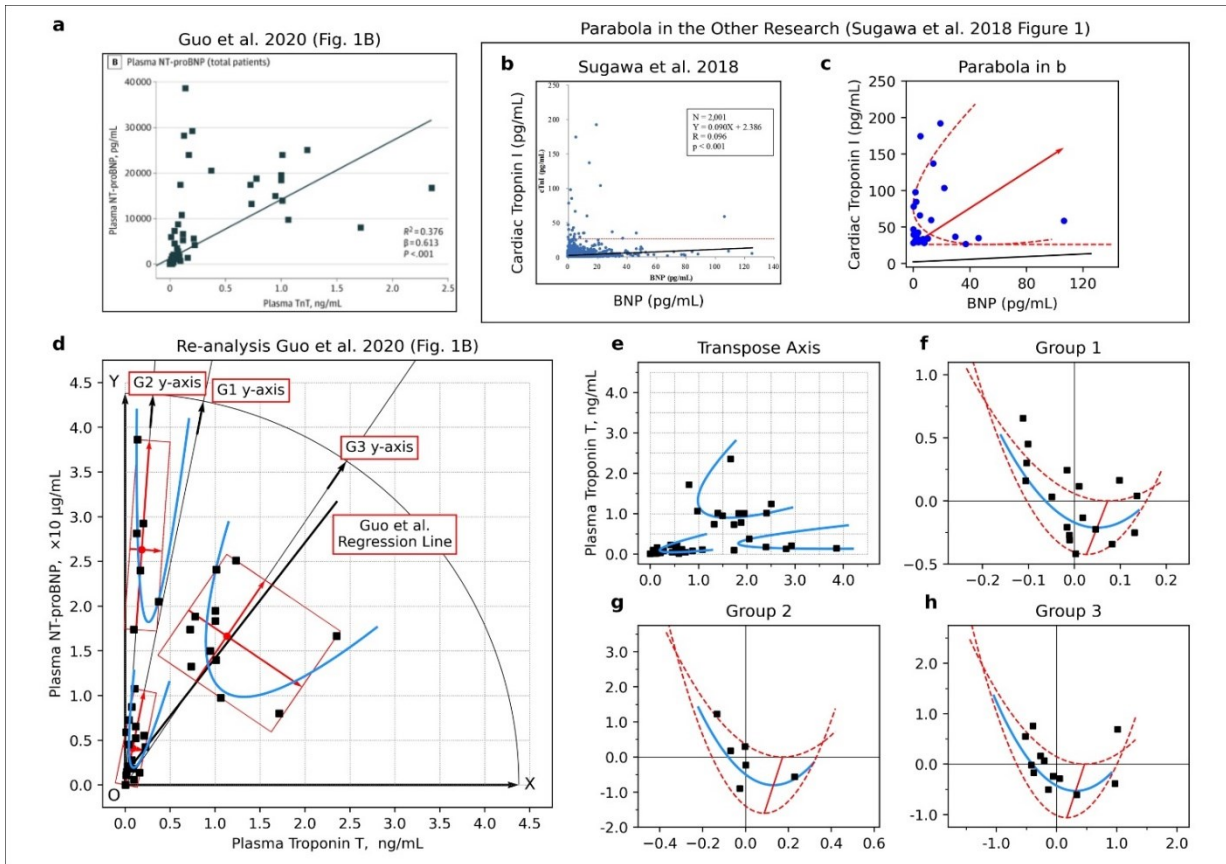

240

241 **Fig. S14. Three subgroup patterns appeared in a figure reported by Guo et al<sup>37</sup>.**

242 **a**, A scatter plot showing the relationship between cardiac troponin T (TnT) and N-terminal pro-brain  
 243 natriuretic peptide (NT-proBNP) in a patient with COVID-19<sup>37</sup>. **b**, Scatter plot to investigate the  
 244 relationship between brain natriuretic peptide (BNP) and cardiac troponin I (cTnl) in healthy subjects  
 245 reported by Sugawa et al<sup>41</sup>. **c**, The visible points that exceeded the value of 26.2 pg/mL (red line in  
 246 panel b) were re-plotted with a parabola (not accurate regression analysis). **d**, Visible points in the  
 247 figure reported by Guo et al<sup>37</sup> with parabolas. **e**, Transposed panel d for easy comparison. **f**, Group 1  
 248 in the small coordinate system (center of gravity as the origin of the coordinate system). **g**, Group 2 in  
 249 the small coordinate system. **h**, Group 3 in the small coordinate system. In panel f-h, the upper curve  
 250 is expressed by a quadratic function, in which a coefficient of the quadratic term equals a value of the  
 251 coefficient of the quadratic term for the solid curve multiplied by 3/2. In the lower curve, the  
 252 coefficient of the quadratic term of the solid curve multiplied by 2/3. Most data points located inside

253 the crescent-shaped region enclosed by the parabolas, but the reason was unclear. Panel a was re-used  
254 from Guo T et al. *JAMA Cardiol.* 2020; 5(7):811-818. Figure 1B  
255 <https://www.ncbi.nlm.nih.gov/labs/pmc/articles/PMC7101506/figure/hoi200026f1/> Copyright © 2020  
256 Guo T et al. *JAMA Cardiology*. Creative Commons Attribution License (CC-BY).  
257 <https://creativecommons.org/licenses/by/4.0/> Panel b was re-used from Sugawa et al. *Sci Rep.* 2018;  
258 8(1):5120. Figure 1. <https://www.ncbi.nlm.nih.gov/labs/pmc/articles/PMC5865159/figure/Fig1/>  
259 Copyright © 2018 The Authors. CC-BY 4.0 License  
260

261

262 **Fig. S15.**

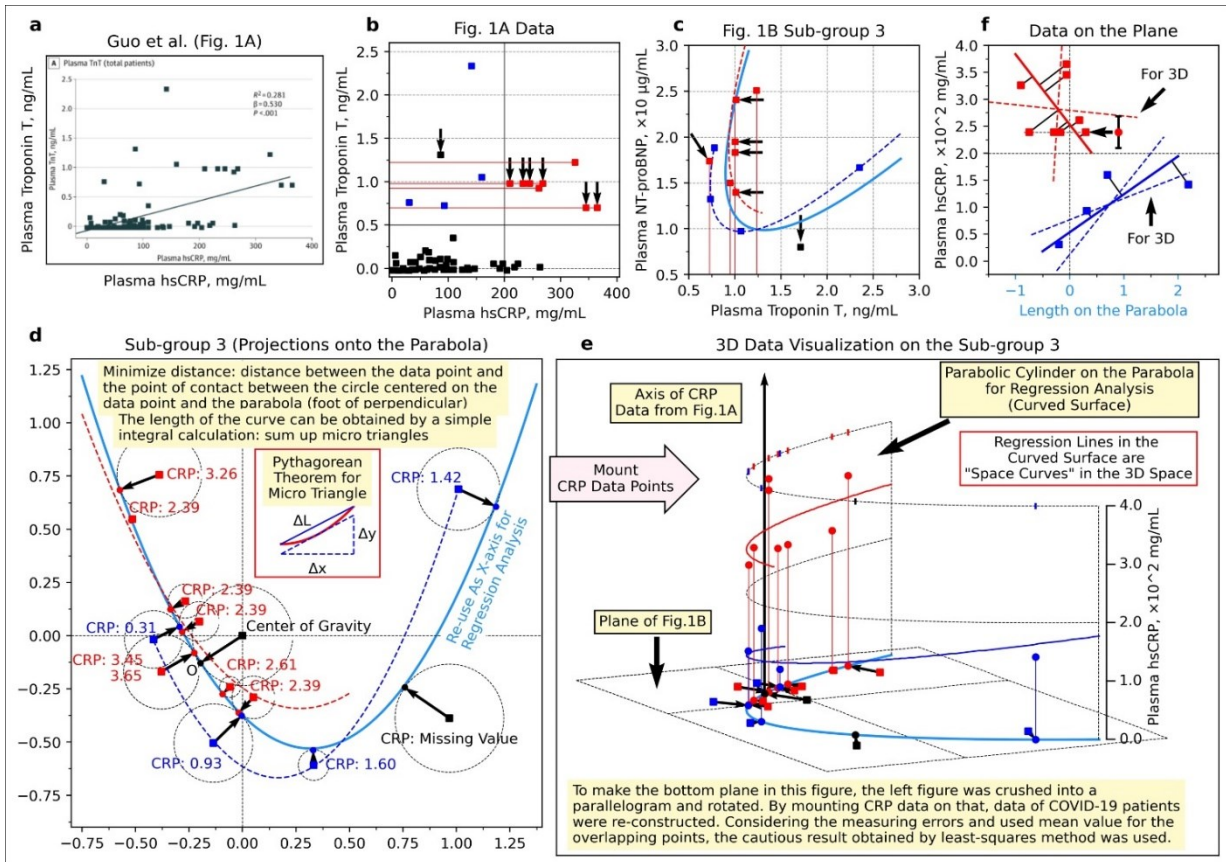

263

264 **Fig. S15. A three-dimensional plot reconstructed from the data reported by Guo et al<sup>37</sup>.**

265 **a**, Scatter plot showing the relationship between high sensitive C-reactive protein (hsCRP) and

266 troponin T (TnT)<sup>37</sup>. **b**, Re-drawn scatter plot with a vertical line around hsCRP = 200 mg/mL = 2.0 ×

267 102 mg/mL. **c**, Enlarged subgroup 3 in panel d of **Fig. S14** (data exceeding hsCRP = 200 mg/mL are

268 indicated by red, data not exceeding hsCRP = 200 mg/mL are indicated by blue). **d**, Enlarged

269 subgroup 3 of panel d in **Fig. S14** with the foot of the perpendicular from each data point to the

270 parabola. **e**, The hsCRP value of each patient placed on panel d (shown as a three-dimensional plot). **f**,

271 The side surface of the parabolic cylinder. The point of TnT = 1.31 observed in panel b is not included

272 in panel c, and the point of TnT = 1.71 in panel c is not included in panel b (inconsistent). In panel e,

273 the projection of the data points onto the parabola was used as new points. In panels e and f, some

274 points of CRP value could not be determined because of overlapping, so those points were replaced

275 with the average value (the points indicated by the left-pointing arrows and the error bar, which are

276 the average values and the range of values, respectively). Panel a was re-used from Guo et al. *JAMA*  
277 *Cardiol.* 2020; 5(7):811-818. Figure 1.  
278 <https://www.ncbi.nlm.nih.gov/labs/pmc/articles/PMC7101506/figure/hoi200026f1/> Copyright © 2020  
279 Guo T et al. *JAMA Cardiology*. Creative Commons Attribution License (CC-BY).  
280 <https://creativecommons.org/licenses/by/4.0/>  
281

282

283 **2. Supporting tables & table legends**

284 **2.1. Supporting Table 1: data review results**

285 To confirm the accuracy of the values, we re-calculated the odds ratio (OR) and confidence  
 286 interval of the OR. In the data reported by Kuipers et al, we re-calculated the Incidence Ratio (IR).  
 287 However, Kuipers et al<sup>5</sup> did not describe a method for calculating the confidence interval of the IR  
 288 (e.g., exact method or not). So we could not calculate the confidence interval. The OR, confidence  
 289 interval of the OR, and IR were re-calculated with Microsoft Excel<sup>R</sup>. The values were rounded by a  
 290 rounding function such as “ROUND()”. The result is shown in following **Table S1**.

291

292 **Table S1. data review results.**

| Ref. | hour         | a  | b     | c     | d      | Re-calculated OR or IR |               |                | Described OR or IR |              |               | Difference   |                |                |
|------|--------------|----|-------|-------|--------|------------------------|---------------|----------------|--------------------|--------------|---------------|--------------|----------------|----------------|
|      |              |    |       |       |        | OR                     | CIL           | CIU            | OR                 | CIU          | CIL           |              |                |                |
| C    | 4-8          | 36 | 18    | 1,673 | 1,724  | 2.00                   | ( 1.14        | 3.52 )         | 2.0                | ( -          | - )           | 0.00         | ( -            | - )            |
|      | 8-12         | 33 | 18    | 1,673 | 1,724  | 1.83                   | ( 1.03        | 3.25 )         | 1.8                | ( -          | - )           | 0.03         | ( -            | - )            |
|      | >12          | 25 | 9     | 1,673 | 1,724  | 2.78                   | ( 1.30        | 5.96 )         | 2.8                | ( -          | - )           | -0.02        | ( -            | - )            |
| K    | 0-4          | 2  | 4,267 | 29    | 27,772 | 0.47                   | ( -           | - )            | 0.5                | ( 0.0        | 1.4 )         | -0.03        | ( -            | - )            |
|      | 4-8          | 5  | 2,180 | 29    | 27,772 | 2.29                   | ( -           | - )            | 2.3                | ( 0.7        | 4.8 )         | -0.01        | ( -            | - )            |
|      | 8-12         | 6  | 2,676 | 29    | 27,772 | 2.24                   | ( -           | - )            | 2.2                | ( 0.8        | 4.4 )         | 0.04         | ( -            | - )            |
|      | 12-16        | 7  | 1,344 | 29    | 27,772 | 5.21                   | ( -           | - )            | 5.2                | ( 2.0        | 9.9 )         | 0.01         | ( -            | - )            |
|      | >16          | 4  | 672   | 29    | 27,772 | 5.95                   | ( -           | - )            | 5.9                | ( 1.5        | 13.4 )        | 0.05         | ( -            | - )            |
| M    | Short & Long |    |       |       |        | 2.10                   | ( 1.11        | 3.97 )         | 2.1                | ( 1.1        | 4.0 )         | 0.00         | ( 0.01         | -0.03 )        |
|      | Short: 2     |    |       |       |        | 1.81                   | ( 0.86        | 3.81 )         | -                  | ( -          | - )           | -            | ( -            | - )            |
|      | Long 13.5    |    |       |       |        | 2.98                   | ( 0.93        | 9.53 )         | 3.0                | ( 0.9        | 9.5 )         | -0.02        | ( 0.03         | 0.03 )         |
| P    | >3           | 5  | 9     | 83    | 325    | 2.18                   | ( 0.71        | 6.68 )         | 2.2                | ( 0.7        | 6.8 )         | -0.02        | ( 0.01         | -0.12 )        |
|      | 3-8          | 0  | 5     | 83    | 325    |                        | ( )           | -              | ( -                | - )          | -             | ( -          | - )            |                |
|      | >8 hr.       | 5  | 4     | 83    | 325    | <b>4.89</b>            | ( <b>1.28</b> | <b>18.61</b> ) | <b>6.0</b>         | ( <b>1.4</b> | <b>25.4</b> ) | <b>-1.11</b> | ( <b>-0.12</b> | <b>-6.79</b> ) |

293 Abbreviations: C: Cannegieter et al, K: Kuipers et al, M: Martinelli et al, P: Parkin et al, OR: Odds  
 294 Ratio, IR: Incidence Ratio, CIL: end of confidence interval (lower limit), CIU; end of confidence  
 295 interval (upper limit).

296



297

298 **2.2. Supporting Table 2: verification of a calculated value by Parkin et al.**

299 In the value reported by Parkin et al<sup>26</sup>, there was a discrepancy between the OR and the  
300 described OR calculated by us. Although Parkin et al might have used unique specifications of the  
301 analysis software (SAS), it was suspected that cells in the cross table were mistaken (e.g., in the table  
302 of Table S2, a, the cell for control and the cell for total was mistaken). However, the error bar's length  
303 was relatively small since the total number of cases was notably smaller than other studies. So,  
304 qualitatively, it could be used to group data to find hyperbolic patterns.

305

306 **Table S2. Verification of a calculated value by Parkin et al.**

| Flight details          | Cases       | Controls      | Row marginal total |
|-------------------------|-------------|---------------|--------------------|
| No long-distance flight | 83          | 325           | 83+325=408         |
| Air travel 8 > hours    | 5           | 4             | 5 + 4 = 9          |
| Column marginal total   | 83 + 5 = 88 | 325 + 4 = 329 | 83 + 5 = 88        |

307 The data in each cell were derived from Parkin et al.

308 (Parkin et al. *Thromb Haemost* 2006; 95: 807-814, Table 5).

309 
$$\text{Odds ratio} = \frac{325 \times 5}{83 \times 4} \cong 4.89$$

310 
$$\text{Calculation using a value of row marginal total} = \frac{408 \times 5}{83 \times 4} \cong 6.0$$

311 = described value by Parkin et al.

312

313

314 **2.3. Supporting Table 3: Changing female percentage from four studies reported in the 1970s to**

315 **2000s.**

316

317 **Table S3. Changing female percentage from four studies reported in the 1970s to 2000s.**

| Author                          | Year | Total N | Male   |       | Female   |       | Larger one |
|---------------------------------|------|---------|--------|-------|----------|-------|------------|
|                                 |      |         | Male N | %     | Female N | %     |            |
| Symington & Stack <sup>33</sup> | 1977 | n=8     | n=5    | 62.5% | n=3      | 37.5% | Male       |
| Cruickshank et al <sup>34</sup> | 1988 | n=6     | n=5    | 83.3% | n=1      | 16.7% | Male       |
| Clérel & Caillard <sup>27</sup> | 1999 | n=64    | n=15   | 23.4% | n=49     | 76.6% | Female     |
| Parkin et al <sup>26</sup>      | 2006 | n=11    | n=4    | 36.4% | n=7      | 63.6% | Female     |

318

319

320

### 321 3. Supporting information: Method details

#### 322 3.1. Deriving the formula for regression analysis

##### 323 1) Mathematical considerations

324 Deriving the exact formula directly was difficult. So, firstly we focused only on the U-  
 325 shaped curve. The length of the confidence interval for the odds ratio is inverse proportional-like to  
 326 the size of the potential patient population, which onset thrombosis by exposure to risk factors (see  
 327 **Fig. S2**). Although, there are multiple possibilities (e.g.,  $1/N$ ,  $1/N^2$ , or  $1/\sqrt{N}$ ), regarding the form  
 328 of equations (1) and (2) below, we intuitively predicted that it would be approximately equal to the  
 329 inverse of the root (equation (3)).

330

$$331 \quad \text{Log}_e(95\%CI) = \text{Log}_e(OR) \pm 1.96 \sqrt{\frac{1}{a} + \frac{1}{b} + \frac{1}{c} + \frac{1}{d}} \quad (1)$$

332

$$333 \quad \sqrt{\frac{1}{a} + \frac{1}{b} + \frac{1}{c} + \frac{1}{d}} = \frac{\sqrt{bcd+acd+abd+abc}}{\sqrt{abcd}} = \frac{\text{complex combination of numbers}}{\sqrt{abcd}} \quad (2)$$

334

$$335 \quad \text{Log}_e(95\%CI) = \text{Log}_e(OR) \pm 1.96 \sqrt{\frac{1}{a} + \frac{1}{b} + \frac{1}{c} + \frac{1}{d}} \cong \text{Log}_e(OR) \pm 1.96 \times \frac{1}{\sqrt{N}} \quad (3)$$

336

337 To be precise, the ability of patient recruitment, in other words, the “sample size in each  
 338 study,” affects the confidence interval length.

339 It is similar to Hooke’s law on spring<sup>59</sup>, which states that the pull-back force of spring is  
 340 proportional to the length of the pull. In this case, the power also depends on the spring type (e.g.,  
 341 thick spring or thin spring). Thus, the formula is as follows, with spring constant (k) depending on the  
 342 kind of spring (equation (4)). Similarly, equation (3) express equation (5) precisely.

343

$$344 \quad \text{Force} = k \times \text{Distance} \quad (4)$$

345

346 
$$\text{Log}_e(95\%CI) = \text{Log}_e(OR) \pm 1.96 \sqrt{\frac{1}{a} + \frac{1}{b} + \frac{1}{c} + \frac{1}{d}} \cong \text{Log}_e(OR) \pm 1.96 \times \frac{k}{\sqrt{N}} \quad (5)$$

347

348 However, we speculated that the effect of the differences in sample size could not be a  
 349 practical problem for two reasons.

350 The first reason is that stratified analysis, often performed in clinical studies, can be a force  
 351 in reducing the differences. The second reason is that two types of boundary conditions in the  
 352 hyperbolic shape fitting, which are the “S-curve” and the “error bar length,” reduce the degree of  
 353 freedom in searching and increase the possibility of finding the desired shape.

354

## 355 2) Numerical Experiment

356 Usually, a sigmoid function is used for curve fitting to a dose-response relationship and  
 357 outline of the cumulative distribution. Also, the curve expressing the end of a confidence interval is a  
 358 sum of the S-shaped and U-shaped curves (see Fig. 1).

359 To decide on a formula to express a U-shaped curve, we performed a numerical experiment.  
 360 The result indicated that a parabola could approximate a U-shaped curve (Fig. 1, c & d). We  
 361 constructed three mathematical formulas for fitting hyperbolic patterns to data (see Fig. 1).

362

## 363 3) Identifying the formula

364 Considering the numerical experiment, we decided on the equations for the S-shaped curve,  
 365 the upper end of the confidence limit, and the lower end of the confidence limit (equation (1), (2), and  
 366 (3)). Note that in the below equations, the coefficient L is generally set as 1. So, we used this equation  
 367 under the condition of L=1 unless there is some reason.

368

369 
$$y = \left\{ \frac{K_1}{1+e^{L(x-M)}} + K_2 \right\} \quad (6)$$

370 
$$y = \left\{ \frac{K_1}{1+e^{L(x-M)}} + K_2 \right\} + (ax^2 + bx + c) \quad (7)$$

371 
$$y = \left\{ \frac{K_1}{1+e^{L(x-M)}} + K_2 \right\} - (ax^2 + bx + c) \quad (8)$$

372

## 373 **3.2. Tools used in this research.**

### 374 **1) Numerical experiment**

375 To generate binomial distribution data, we used the “BINOM.DIST” function, which is a  
376 function for calculating the probability of binomial distribution in a kind of spreadsheet software,  
377 Microsoft Excel<sup>®</sup> (Microsoft Corporation, Redmond, Washington, US).

378

### 379 **2) Regression analysis**

380 Regression analysis was performed using Python (Python Software Foundation, Delaware,  
381 USA <https://www.python.org/psf/records/incorporation/>). At this time, Python's functional modules  
382 NumPy (NumFOCUS sponsored open-source project, <https://numpy.org/>), Pandas (NumFOCUS  
383 sponsored open-source project, <https://pandas.pydata.org/>), SciPy (NumFOCUS sponsored open-  
384 source project, <https://www.scipy.org/>) and Matplotlib (NumFOCUS sponsored open-source project,  
385 <https://matplotlib.org/>) were also used.

386 Additionally, a function as “Chart option” of Microsoft Excel<sup>®</sup>, which was shown in the  
387 "Trendline Options" section contained in “Format Trendline,” was used.

388

### 389 **3) Reading values in the figures**

390 Reading values from the published figures were performed using the public domain software  
391 ImageJ (<https://imagej.net/Welcome>).

392

### 393 **4) Other tools**

394 When symbolic formula manipulation was required, formula manipulation software  
395 wxMaxima (Project Maxima maintained by 27 volunteers, <https://maxima.sourceforge.io/>) was used.

396

397

### 398 **3.3. Analysis 1A (dataset: Chandra et al)<sup>10</sup>**

#### 399 **1) Data review to validate eligibility for regression analysis**

400 a. The process of data review in this analysis

401 As the first step, we performed data mapping. In the figure of meta-regression analysis  
402 reported by Chandra et al<sup>10</sup>, it was not described what the data points correspond to the four original  
403 papers (Martinelli et al, 2003; Parkin et al, 2006; Cannegieter et al, 2006 and Kuipers et al,  
404 2007)<sup>1,3,5,26</sup>. So, we measured the positions of each point and compared them with the original  
405 descriptions in the papers.

406 In the second step, we performed a data review, which was an examination of the accuracy  
407 of cited values, and appropriately from the viewpoint of biomedicine. Our re-calculation confirmed  
408 the odds ratio (OR), confidence interval of the OR, and adjusted OR. In examining the values, we did  
409 not confirm Chandra et al<sup>10</sup> and the four authors<sup>1,3,5,26</sup> because Chandra et al described that each author  
410 did not respond to the inquiry<sup>10</sup>. As a final step, we performed regression analysis using the eligible  
411 data for using regression analysis.

412

#### 413 **b. Data review**

414 In Parkin et al<sup>26</sup>, there was a discrepancy between the OR and the described OR calculated  
415 by us. Also, it was suspected that cells in the cross table were mistaken (*e.g.*, in the table of Fig. 1a,  
416 the cell for control and the cell for total were mistaken). However, the error bar's length was relatively  
417 small since the total number of cases was notably smaller than other studies. So, qualitatively, it could  
418 be used to group data to find hyperbolic patterns.

419

#### 420 **2) Regression Analysis**

421 For the data judged as eligible, hyperbolic patterns were visually searched, and each data  
422 point was grouped into two groups. Then, a non-linear regression analysis using the formulas above  
423 was performed. In the fitting of the U-shaped curve, since there were many unknown coefficients for  
424 the number of data (there are seven unknowns,  $K_1$ ,  $K_2$ ,  $M$ ,  $a$ ,  $b$ , and  $c$ . in the equations (7) and (8)), the

425 S-curve was fitted first, and the remaining unknown coefficients (a, b, c) were fitted to the residuals of  
426 the S-curve fitting (see equation (7) and (8)).

427

### 428 3) Additional analysis

429 As described above, the cyclic pattern in the data reported by Cannegieter et al<sup>3</sup> was  
430 observed, and we performed additional analysis. To conduct an appropriate non-linear regression  
431 analysis, we made an equation by combining two types of equations. The exponential decay equation  
432 was usually used to express radioactive decay in physics and clearance in medicine. The other was a  
433 trigonometric function (sine function) to express waveforms. The equation is shown in as below  
434 equation (9). Also, this scientific model (model formula) was used to estimate the ratio of patients by  
435 integral calculation.

436

$$437 \quad y = N_1 e^{-\lambda_1(t-b)} + N_2 e^{-\lambda_2(t-b)} \text{Asin}\{B(t - b)\} \quad (9)$$

438

439 The data reported as a bar graph was weekly data (see Fig. 4). So, the week was converted  
440 into the number of days before the analysis, such as; the day getting off the vehicle was set as days 0,  
441 the first week was set as days 4, the second week was set as days 4 + 7, and the third week was set as  
442 days 4 + 7 × two, and the Nth week was set as days 4 + 7 × N.

443 Supplementary, according to the original description by Cannegieter et al<sup>3</sup>, 68 patients  
444 developed thrombosis in the first week, and “233” patients developed thrombosis within eight weeks  
445 after traveling. However, there was a slight discrepancy in the values read from the bar graph. The  
446 value in our measurement within eight weeks after traveling was “234”, but the effect of only one  
447 patient was allowed to be regarded as small. Cannegieter et al described that there were missing  
448 values<sup>3</sup>. The mismatch between our measurement and description might be related to the described  
449 explanation.

450

451

452 **3.4. Analysis 1B (dataset: Philbrick et al) <sup>7</sup>**

453 **1) Dataset search and data review**

454 a. Dataset search

455 To validate the result of analysis 1A, we searched another dataset from a meta-analysis or  
456 systematic review of the traveler's thrombosis. To conduct this search, we used PubMed® setting the  
457 following search keywords: "economy class syndrome [Title]" OR "traveler's [Title] AND  
458 thrombosis [Title]" OR "traveler's [Title] AND thromboembolism [Title]" OR "flight [Title] AND  
459 thrombosis [Title]" OR "flight [Title] AND thromboembolism [Title]" OR "flight-related [Title] AND  
460 thrombosis [Title]" OR "flight-related [Title] AND thromboembolism [Title]" OR "travel [Title] AND  
461 thrombosis [Title]" OR "travel [Title] AND thromboembolism [Title]" OR "travel-related [Title]  
462 AND thrombosis [Title]" OR "travel-related [Title] AND thromboembolism [Title]" (Filters: Meta-  
463 Analysis, Systematic Review).

464 As a result, we obtained the eight articles (da Silva LF et al. *J Vasc Bras.* 2021  
465 10;20:e20200164; Benhaberou-Brun *Perspect Infirm.* 2010 7(3):16-7; Chandra et al. *Ann Intern Med.*  
466 2009 151(3):180-90; Kuipers et al. *J Intern Med.* 2007 262(6):615-34; Philbrick et al. *J Gen Intern*  
467 *Med.* 2007 22(1):107-14; Hsieh et al. *J Adv Nurs.* 2005 51(1):83-98; Ansari et al. *J Travel Med.*  
468 2005;12(3):142-54; Adi et al. *BMC Cardiovasc Disord.* 2004 19;4:7).

469 Subsequently, we selected articles containing available abstracts on PubMed® online,  
470 confirming the contents. As a candidate for our analysis, we chose a systematic review reported by  
471 Philbrick et al. <sup>7</sup>. The study was taken up by the ACP Journal Club of the American College of  
472 Physicians <sup>8</sup>. So, it seemed to be a highly reputed study. Therefore, we regarded that the dataset  
473 contained in the research was suitable for validation.

474 Also, the research contained two lists of tables, one of which was a cohort studies dataset,  
475 and the other was case-control studies. However, the case-control studies had many different exposure  
476 factors. So, we decided to use only the cohort studies dataset.

477



478 b. Data review

479 In the data review process, we reviewed the table containing ten cohort studies<sup>27,28,60-67</sup> and  
480 found seven eligible cohort studies<sup>27,60-63,65,66</sup> for regression analysis. In Gajic et al and Kelman et al,  
481 only distances were described<sup>28,67</sup>, and Hughes et al reported duration data for not per one flight (e.g.,  
482 mean 39.4 h)<sup>64</sup>, so time data for regression analysis was unavailable.

483 Additionally, although Philbrick et al described that incidence per million was 0.5 on the  
484 result reported by Clérel & Caillard<sup>27</sup>, Clérel & Caillard mentioned, “According to the number of  
485 passengers landing in the Aeroports de Paris, the incidence during 1998 is 0.5 per million  
486 passengers”<sup>27</sup>.

487

488 **2) Regression Analysis**

489 For the seven studies, data stratified by Pulmonary Embolism (PE) and Deep Vein  
490 Thrombosis (DVT), regression analysis was performed using an S-shaped curve formula (see equation  
491 (1)). In the case of curve-fitting on DVT data, we canceled the setting of coefficient L=1 to increase  
492 the degree of freedom of the S-curve (**Fig. 1, b**). To show the error bar in the figure, we did not use  
493 the values of confidence limits described in the report by Philbrick et al<sup>7</sup>, but values were re-  
494 calculated from the number of cases using Wilson's method.

495 In the seven studies, not OR or relative risk (RR), only the data indicating the incidence rate  
496 of thrombosis was available. So, the hyperbolic pattern did not appear in the figure theoretically, and  
497 we performed only the S-shaped curve fitting. This mechanism is explanted from the following  
498 calculation on a confidence interval of a ratio.

499 The formula for a 95% confidence limit of a ratio using binomial approximation is  
500 expressed by the following formula: P is a ratio, and N is the number of trials.

501

502 
$$P - 1.96 \frac{\sqrt{P(1-P)}}{\sqrt{N}} \leq P \leq P + 1.96 \frac{\sqrt{P(1-P)}}{\sqrt{N}} \quad (10)$$

503

504 In the above equation, the fraction's numerator is not a constant value. It does not depend on only the  
505 N, which is associated with a data point's position in a population (see Fig. S2).

506 In this regression analysis, converting time categories to time points was necessary, so we  
507 performed this in three directions. The first one was taking the midpoint if the category was not the  
508 end of a category sequence (e.g., 10-15 h could be converted to 12.5 h). The second one took the  
509 midpoint between the time point of 0 and the lower limit of the category if the category was the lower  
510 end of a category sequence (e.g., <3 h could be converted to 1.5 h). The third one was taking the sum  
511 of the value of the upper limit and the value of the midpoint between the time point of 0 and the lower  
512 limit of the category sequence if the category was the upper side of a category sequence (e.g., > 12 h  
513 could be converted to 12 h + 1.5 h = 13.5 h). Details of conversions are shown below (the original time  
514 category is shown in brackets).

515 Belcaro et al [10-15 h]: 12.5 h (Belcaro, G. et al., *Angiology*. 2001;52(6):369-74.)<sup>60</sup>; Clérel  
516 et al [12.7 h]: 12.7 h (Clérel, M., & Caillard, G., *Bull Acad Natl Med*. 1999;183(5):985-97.)<sup>27</sup>;  
517 Jacobson et al. [11 h]: 11 h; Lapostolle et al [<3 h, 3-6 h, 6-9 h, 9-12 h, > 12 h]: 1.5 h, 4.5 h, 7.5 h,  
518 10.5 h, 13.5 h (12 + 1.5 = 13.5 h) (Jacobson, B.F. et al., *S Afr Med J*. 2003;93(7):522-8.)<sup>63</sup>; Pérez-  
519 Rodríguez et al [<6 h, 6-8 h, > 8 h]: 3 h, 7 h, 11 h (8 + 3 = 11 h) (Pérez-Rodríguez, E. et al., *Arch*  
520 *Intern Med*. 2003;163(22):2766-70.)<sup>65</sup>; Schwarz et al 2002 [> 8 h]: 12 h (midpoint of 0-8 h is 4 h and  
521 8 + 4 = 12 hours) (Schwarz, T. et al., *Blood Coagul Fibrinolysis*. 2002;13(8):755-7.)<sup>62</sup>; Schwarz et al  
522 2003 [> 8 h]: 12 h (midpoint of 0-8 h is 4 h and 8 + 4 = 12 hours) (Schwarz, T. et al., *Arch Intern*  
523 *Med*. 2003 2003;163(22):2759-64.)<sup>66</sup>.

524

### 525 3) Additional analysis

526 a. Regression analysis (data: Kelman et al<sup>28</sup>)

527 In the review process, a cyclic pattern was observed. So, we worked on regression analysis.  
528 Considering that onset of thrombosis tends to increase again, an equation upward-sloping curve was  
529 added to equation (9). The equation is the following (11).

530

$$531 \quad y = N_1 e^{-\lambda_1(t-b)} + N_2 e^{-\lambda_2(t-b)} \text{Asin}\{B(t-b)\} + (ax^2 + bx + c) \quad (11)$$

532

533 b. Analysis by using correlogram (data: Clérel & Caillard<sup>27</sup>)

534 We considered using the “correlogram” in this study because it was more practical than  
535 observing the original data's fluctuation. Periodic fluctuation patterns may be unclear when looking at  
536 the original data alone, but potential patterns can be obtained using a correlogram, a data visualization  
537 method for analyzing time-series data. Also, as the correlation coefficient plotted on the correlogram,  
538 we decided to use Spearman's rank correlation coefficient instead of Pearson's product-moment  
539 correlation coefficient, which is easily affected by outliers. Also, we performed a non-linear  
540 regression analysis using a mathematical formula (12) that includes two sine functions.

541

$$542 \quad y = n_1 \sin\{a_1(x - b_1)\} + n_2 \sin\{a_2(x - b_2)\} \quad (12)$$

543

544 In correlogram creation, firstly, a combination of data (data X1, data X1) was created by  
545 arranging the original time series data (data X1), and a new combination (data X1, data X1') was  
546 created by shifting one of them. Secondary, the correlation coefficient (also called the auto-correlation  
547 coefficient) between the original time-series data (data X1) and the sifted time-series data (data X1'),  
548 except at the ends of two types of time-series data where some correspondence could not be formed.  
549 By repeating shifting the time string data and calculating the correlation coefficient, the locus of the  
550 correlation coefficient becomes the shape of waves. Firstly (original waves of time strings are  
551 overlapped), the correlation coefficient is 1, and the value of the correlation coefficient gradually  
552 decreases. Finally (the wave is inverted), the correlation coefficient is -1.

553

554

### 555 **3.5. Analysis 1B-related additional analysis**

#### 556 **1) Literature search**

557 We searched the literature for trend analysis. To conduct this search, we used PubMed®  
558 setting the following search keywords: “economy class syndrome,” “traveler's thrombosis,” and  
559 “travel-related thrombosis.”

560

561 a. Details of the keyword (“economy class syndrome”)

562 Search: (economy[Title]) AND (class[Title]) AND (syndrome[Title])

563

564 b. Details of the keyword (“traveler's thrombosis”)

565 Search: ((traveller's[Title]) AND (thrombosis[Title])) OR ((traveller's[Title]) AND

566 (thromboembolism[Title])) OR ((traveller's[Title]) AND (pulmonary[Title]) AND (embolism[Title]))

567 OR ((traveller's[Title]) AND (deep[Title]) AND (vein[Title]) AND (thrombosis[Title])) OR

568 ((traveller's[Title]) AND (venous[Title]) AND (thrombosis[Title])) OR ((traveller's[Title]) AND

569 (venous[Title]) AND (thromboembolism[Title]))

570

571 c. Details of the keyword (“travel-related thrombosis”)

572 Search: ((travel-related[Title]) AND (thrombosis[Title])) OR ((travel-related[Title]) AND

573 (thromboembolism[Title])) OR ((travel-related[Title]) AND (pulmonary[Title]) AND

574 (embolism[Title])) OR ((travel-related[Title]) AND (deep[Title]) AND (vein[Title]) AND

575 (thrombosis[Title])) OR ((travel-related[Title]) AND (venous[Title]) AND (thrombosis[Title])) OR

576 ((travel-related[Title]) AND (venous[Title]) AND (thromboembolism[Title]))

577

578 **2) Confirming citation history**

579 To confirm citation history, we checked the “Citations & Impact” page on the Europe PMC  
580 website (<https://europepmc.org/>).

581

582 **3) Additional analysis**

583 a. Data visualization

584 We displayed patient data as a bar chart “by one year” after collecting from several studies.

585 Also, we made a scatter plot as age on the horizontal axis and travel time on the vertical axis.

586 b. Regression analysis

587 We performed regression analysis using the same curve as the normal distribution. In

588 women, we use inversed curve. Also, we fitted combined two S-shaped curves represented by sigmoid

589 functions.

590 
$$y = Le^{-a(x-d)^2} \tag{13}$$

591 
$$y = L_2 - L_1 \exp(-a(x-d)^2) \tag{14}$$

592 
$$y = \left( \frac{L}{1 + \exp(-a_1(x-d_1))} \right) + \left( \frac{L}{1 + \exp(a_2(x-d_2))} \right) - L \tag{15}$$

593

594

### 595 3.6. Analysis 2 (dataset: COVID-19)<sup>36</sup>

#### 596 1) Dataset search and data review

##### 597 c. Dataset Search

598 To apply our idea to COVID-19 problems, one of the authors (KK) searched hyperbolic  
599 patterns using the search service Google (<https://www.google.com/>) provided by Google Inc., which  
600 allows displaying search results as “images.” The search keyword was “COVID-19 AND Meta-  
601 analysis”. In the case of displaying bubble charts instead of the error bars, the size of the bubble chart  
602 (inversely proportional to the length of the error bars) was converted in mind. Consequently, we  
603 selected a study reported by Matsushita et al (Matsushita, K. et al., *Glob Heart*. 2020;15(1):64.)<sup>36</sup> that  
604 included eight research papers in Figure 5<sup>52-58,68</sup>.

605

##### 606 d. Data review

607 As in the case of Analysis 1, we reviewed to evaluate numerical accuracy and  
608 appropriateness from the viewpoints of biomedicine. Since Matsushita et al<sup>36</sup> originally made web  
609 Figure 5 and excluded 17 studies<sup>37,69-84</sup> from avoiding duplication of studies in Wuhan city in the  
610 making of Figure 5, we inspected both of studies in Figure 5 (8 studies) and only in web Figure 5 (17  
611 studies).

612 Based on the results shown below, considering the issue of comparability, we excluded the  
613 data reported by Yuan et al<sup>68</sup> and Wang L. et al<sup>56</sup>. Also, we re-calculated the age difference using data  
614 reported by Guan et al<sup>54</sup> (see Fig. 2).

615 As a side note, the numbers assigned to each point in figure 3 were the same numbers  
616 described in the original figure by Matsushita et al<sup>36</sup>, and the correspondence relationship is the  
617 following (Fig. S12): **No.2**: Cao et al (Cao, J. et al., *Intensive Care Med*. 2020;46(5):851-853.)<sup>52</sup>,  
618 **No.7**: Deng et al (Deng, Y. et al., *Chin Med J (Engl)*. 2020;133(11):1261-1267.)<sup>53</sup>, **No.8**: Guan et al  
619 (Guan, W.J. et al., *N Engl J Med*. 2020;382(18):1708-1720.)<sup>54</sup>, **No.19**: Wang D. et al (Wang, D. et al.,  
620 *JAMA*. 2020;323(11):1061-1069.)<sup>55</sup>, **No.20**: Wang L. et al (Wang, L. et al., *J Infect*. 2020;80(6):639-  
621 645.)<sup>56</sup>, **No.21**: Wu et al (Wu, C. et al., *JAMA Intern Med*. 2020;180(7):934-943.)<sup>57</sup>, **No.23**: Yuan et al

622 (Yuan, M. et al., *PLoS One*. 2020;15(3):e0230548)<sup>68</sup>, No.25: Zhou et al (Zhou, F. et al., *Lancet*.  
623 2020;395(10229):1054-1062.)<sup>58</sup>.

624

625 (i) No.8 Guan et al (Guan, W.J. et al., *N Engl J Med*. 2020;382(18):1708-1720.)<sup>54</sup>

626 Matsushita et al<sup>36</sup> did not use the data divided into the severe and non-severe groups by  
627 Guan et al<sup>54</sup> but used the data divided into yes and no, using “Presence of Primary Composite End  
628 Point,” which means entry to the intensive care unit (ICU), use of mechanical ventilation, or death.

629 Since Cao et al (Wuhan University Zhongnan Hospital in Wuhan; affiliation of Dr. Jianlei  
630 Cao: Department of Cardiology)<sup>52</sup> and Wang et al (Zhongnan Hospital of Wuhan University in  
631 Wuhan; affiliation of Dawei Wang, MD: Department of Critical Care Medicine)<sup>55</sup> also used ICU  
632 admission as a criterion for severe or non-severe, we examined the rate of severely ill patients and  
633 resulted in 21.4% (18/84) and 35.3% (36/102), respectively. However, in the case of using the  
634 “Presence of Primary Composite End Point,” the percentage was only 6.5% (67/1032). Whereas, in  
635 the original categorization by Guan et al<sup>54</sup>, the percentage was 18.7% (173/926). Therefore, we  
636 prioritized Guan et al's original classification of severe or non-severe<sup>54</sup>.

637

638 (ii) No. 9 Guo et al (Guo et al. *JAMA Cardiol*. 2020;5(7):811- 818)<sup>37</sup> (only in eFigure5)

639 Three subgroup patterns appeared in a figure reported by Guo et al, although they did not  
640 mention it.

641

642 (iii) No. 20 Wang L. et al (Wang, D. et al., *JAMA*. 2020;323(11):1061-1069.)<sup>56</sup>

643 It was found that a significant matter of consideration on eligibility, the patient population  
644 reported by Wang L. et al was limited to over age 60<sup>56</sup>. The title was “Coronavirus disease 2019 in  
645 elderly patients: Characteristics and prognostic factors based on 4-week follow-up”.

646

647 (iv) No.23 Yuan M. et al (Yuan M. et al., *PLoS One*. 2020;15(3):e0230548.)<sup>68</sup>

648 The zero cells appeared in the study reported by Yuan et al<sup>68</sup>. The difficulty of patient  
649 enrollment might cause a small sample size, which seemed to be a concern from the viewpoint of

650 comparability (c.f., Guan W. et al, n=1099<sup>54</sup>; Zhou F. et al, n=191<sup>58</sup>; Wang D. et al, n=138<sup>55</sup>; Wu C. et  
651 al, n=201<sup>57</sup>; Cao J. et al, n=102<sup>52</sup>; Deng Y. et al, n=225<sup>53</sup>).

652

653 (v) The term “Cardiovascular disease (CVD).”

654 There was an inconsistency in the studies on “Cardiovascular disease (CVD).” For example,  
655 vascular diseases such as arrhythmia and arteriosclerosis are also classified as CVD, but in the studies  
656 reported by Guan et al<sup>54</sup> and Zhou et al<sup>58</sup>, the term “Coronary heart disease” was used. Also, “Cardiac  
657 disease” was used by Yuan et al<sup>68</sup>, “Heart disease” was used by Deng et al<sup>53</sup>, and “Cardiovascular  
658 disease” was used by Wang L et al<sup>56</sup>.

659

## 660 2) Regression analysis

661 Considering the problem of comparability, we re-calculated OR and visually grouped it into  
662 two hyperbolic patterns. In the case of S-shaped curve fitting, since there were many unknown  
663 coefficients for the number of data (3 unknown coefficients of  $K_1$ ,  $K_2$ , and  $M$ ), the regression analysis  
664 was performed after setting the zero point value.

665 In the fitting of upper and lower curves, since there were many unknown coefficients ( $K_1$ ,  
666  $K_2$ ,  $M$ ,  $a$ ,  $b$ ,  $c$ , see equation (7) & (8)), we first obtained the coefficient of  $M$  by the curve fitting of the  
667 S-shaped curve, and then performed curve fitting of parabolas. After substituting  $M$  for the  $x$  value of  
668 apex in equation for standard form of quadratic function (see equation (16) & (17)), regression  
669 analysis was performed on the data in the middle row of the figure (**Fig. S11, d-f**). Finally, the S-  
670 shaped curve and the parabola were merged (**Fig. S11, g-i**).

671

$$672 \quad ax^2 + bx + c = a \left( x + \frac{b}{2a} \right)^2 - \frac{b^2 - 4ac}{4a} \quad (16)$$

673

$$674 \quad -\frac{b}{2a} = M \quad (17)$$

675



676 **3) Calculation of weighted average**

677 In the earlier days group, the median age and the number of cases are tabulated by severe  
678 and non-severe cases as follows. Guan W. et al (severe n=173 [age: 52] vs. non-severe n=926 [age:  
679 45])<sup>54</sup>, Zhou F. et al (non-survival n=54 [age: 69] vs. survival n=137 [age: 52])<sup>58</sup>, Wang D. et al. (ICU  
680 n=36 [age: 66] vs. non-ICU n=102 [age: 51])<sup>55</sup>, Wu C. et al (ARDS n=84 [age: 58.5] vs. non-ARDS  
681 n=117 [age: 48])<sup>57</sup>, and the whole of earlier days group (severe n = 347 vs. non-severe n = 1282).

682 The weighted average of severe and non-severe in the earlier days group was calculated  
683 from these values by the following formulas. In the earlier days group, the weighted average of severe  
684 and non-severe were 57.7 and 46.5, respectively.

685

686 
$$\text{Number of patients in earlier days group (severe)} = 173 + 54 + 36 + 84 = \mathbf{347}$$

687 
$$\text{Weighted mean of earlier days group (severe)}$$

688 
$$= \frac{173}{347} \times 52 + \frac{54}{347} \times 69 + \frac{36}{347} \times 66 + \frac{84}{347} \times 58.5 \cong 57.7$$

689

690 
$$\text{Number of patients in earlier days group (non - severe)} = 926 + 137 + 102 + 117$$

691 
$$= \mathbf{1282}$$

692 
$$\text{Weighted mean of earlier days group (non - severe)}$$

693 
$$= \frac{926}{1282} \times 45 + \frac{137}{1282} \times 52 + \frac{102}{1282} \times 51 + \frac{117}{1282} \times 48 \cong 46.5$$

694

695 In the later days group, the median age and the number of cases are tabulated by severe and  
696 non-severe cases as follows. Cao J. et al (ICU n=18 [age: 66] vs. non-ICU n=84 [age: 31])<sup>52</sup>, Deng Y.  
697 et al. (Death n=109 [age: 69] vs. survival n=116 [age: 48])<sup>53</sup>, and the whole of later days group  
698 (severe n = 127 vs. non-severe n = 200).

699 The weighted average of severe and non-severe in the late-date group was calculated using  
700 the following formulas. In the late date group, the weighted average of severe and non-severe were  
701 68.6 years and 40.9, respectively.

702

703 
$$\text{Number of patients in late date group (severe)} = 18 + 109 = \mathbf{127}$$

704 
$$\text{Weighted mean of late date group (severe)} = \frac{18}{127} \times 66 + \frac{109}{127} \times 69 \cong 68.6$$

705 
$$\text{Number of patients in late date group (non - severe)} = 84 + 116 = \mathbf{200}$$

706 
$$\text{Weighted mean of late date group (non - severe)} = \frac{84}{200} \times 31 + \frac{116}{200} \times 48 \cong 40.9$$

707

#### 708 **4) Additional analysis: Regression analysis on the parabolic cylinder**

709 One of the authors (KK) found a way to fit an appropriate curve to the data reported by Guo  
710 et al, performing trial and error with his mathematical intuition (**Fig. 6**). Firstly, he calculated the  
711 center of gravity of the data by each subgroup cluster (center of gravity: the average of the values on  
712 the horizontal axis x and the average of the values on the vertical axis y). Second, he obtained  
713 equations of three straight lines passing through the origin and centers of gravity. Thirdly, he obtained  
714 the equation of a straight line passing through each center of gravity and intersecting the straight lines  
715 obtained above. Fourthly, he re-set new origin as each center of gravity and regarded the above two  
716 crossed lines as a small cartesian coordinate system. Finally, he applied parabola fitting with Excel<sup>®</sup>.  
717 In this curve fitting, he used the data of distance between each data point and the straight line obtained  
718 secondary, and the data of distance between each data point and the straight line obtained firstly (see  
719 “distance from a point to a line” in a high school textbook).

720 Supplementary, our result suggested that the treatment of implicit function, which is  
721 unfamiliar in the medical and biological fields, is required. In this research, we used our method to fit  
722 the curves. However, a Fortran program created by Dr. Timmes<sup>85</sup>, a researcher in astronomy, may also  
723 be helpful for future research.

724

#### 725 **5) Making example data**

726 To explain the misuse of linear regression analysis in Guo et al<sup>37</sup>, we made the following  
727 data to show the example. It allows being used in R by copying and pasting the following.

728

729 Value\_X<-  
730 c(0.04 ,0.08 ,0.12 ,0.16 ,0.2 ,0.24 ,0.28 ,0.32 ,0.36 ,0.4 ,0.44 ,0.48 ,0.52 ,0.56 ,0.6 ,0.64 ,0.68 ,0.72 ,0.7  
731 6 ,0.8 ,0.84 ,0.88 ,0.92 ,0.96 ,1 ,1.04 ,1.08 ,1.12 ,1.16 ,1.2 ,1.24 ,1.28 ,1.32 ,1.36 ,1.4 ,1.44 ,1.48 ,1.52 ,  
732 1.56 ,1.6 ,1.64 ,1.68 ,1.72 ,1.76 ,1.8 ,1.84 ,1.88 ,1.92 ,1.96 ,2 ,2.04 ,2.08 ,2.12 ,2.16 ,2.2 ,2.24 ,2.28 ,2.  
733 32 ,2.36 ,2.4 ,2.44 ,2.48 ,2.52 ,2.56 ,2.6 ,2.64 ,2.68 ,2.72 ,2.76 ,2.8 ,2.84 ,2.88 ,2.92 ,2.96 ,3 ,3.04 ,3.08  
734 ,3.12 ,3.16 ,3.2 ,3.24 ,3.28 ,3.32 ,3.36 ,3.4 ,3.44 ,3.48 ,3.52 ,3.56 ,3.6 ,3.64 ,3.68 ,3.72 ,3.76 ,3.8 ,3.84 ,  
735 3.88 ,3.92 ,3.96 ,4)

736

737 Value\_Y<-  
738 c(2.01742 ,2.02749 ,2.04454 ,2.02009 ,2.03445 ,2.04749 ,2.03641 ,1.99047 ,1.98671 ,2.06711 ,2.0977  
739 2 ,2.00539 ,1.86985 ,2.01679 ,2.12183 ,1.94453 ,1.86497 ,1.87444 ,2.09483 ,1.91073 ,1.69244 ,1.709  
740 68 ,1.81376 ,2.04219 ,1.69059 ,1.75939 ,1.95321 ,1.8417 ,1.58169 ,1.75585 ,1.73497 ,1.47847 ,1.911  
741 5 ,1.44962 ,1.85063 ,1.32298 ,1.28437 ,1.74621 ,1.27232 ,1.32763 ,1.575 ,1.56609 ,1.5933 ,1.76707 ,  
742 1.11264 ,1.06188 ,1.40139 ,0.94084 ,1.0756 ,1.38507 ,1.33408 ,1.54375 ,1.60257 ,1.02029 ,0.98612 ,  
743 1.79094 ,0.97916 ,0.81212 ,1.1484 ,1.5168 ,1.70236 ,1.38945 ,1.69072 ,1.75042 ,1.67571 ,1.38623 ,1.  
744 81503 ,1.80665 ,1.41073 ,2.3175 ,2.24852 ,1.7595 ,2.81818 ,1.93654 ,2.36998 ,2.0987 ,2.19539 ,2.44  
745 747 ,2.57255 ,3.24637 ,2.78881 ,3.51638 ,2.68107 ,2.87259 ,4.3749 ,3.13393 ,3.92099 ,4.1223 ,3.785  
746 84 ,4.9666 ,5.4888 ,5.70712 ,4.84752 ,5.1409 ,6.31637 ,5.53198 ,6.89257 ,7.86387 ,7.98237 ,8.64705  
747 )

748

749

750

#### 751 **4. Supporting discussions**

##### 752 **4.1. Supporting discussion 1: history of traveler's thrombosis**

753 In 2004, Adi et al performed a systematic review and meta-analysis on traveler's thrombosis.  
754 They reported that more than 8 hours of flight with other risk factors for thrombosis might be  
755 involved in the onset, but it was not conclusive evidence<sup>2</sup>. In 2007, Philbrick et al performed a  
756 systematic review study and reported that more than 6 hours of flight with other risk factors were  
757 involved in developing thrombosis<sup>7</sup>. In the same year, Spencer reviewed the article in the ACP  
758 Journal Club produced by the American College of Physicians and commented that more than 8 hours  
759 of flight would be a risk<sup>8</sup>. Also, Kuipers et al<sup>6</sup> performed a systematic review. They reported that  
760 flights of 4 hours or more were risk factors for symptomatic events, and flights of 12 hours or more  
761 were risk factors for pulmonary embolism (PE)<sup>6</sup>.

762 However, in 2008, the discussion has returned to the beginning because Trujillo-Santos et al  
763 performed a systematic review & meta-analysis and reported that long-distance travel was a risk, but  
764 the relationship was weak<sup>9</sup>.

765 In 2009, to find out the cause of the above, Chandra et al performed a meta-analysis (meta-  
766 regression analysis)<sup>10</sup> using a dataset derived from the data of 4 original studies<sup>1,3,5,26</sup>, which were  
767 acquired by Martinelli et al, Cannegieter et al, Parkin et al, and Kuipers et al Chandra et al. They  
768 concluded that the cause of controversy was caused by “referred control,” which was a type of  
769 inappropriate selection of control<sup>10</sup>.

770 Some researchers regarded that the study clarified a confusing body of evidence. Also, the  
771 study received positive feedback in the professional community<sup>15,17</sup>, but some disagreement was also  
772 proposed. For example, in the editorial article, Vandenbroucke et al showed their argument that the  
773 discussion by Chandra et al was incomplete<sup>11</sup>.

774 Moreover, in the subsequent articles, clear conclusions have not appeared<sup>12-14,16</sup>. Considering  
775 this situation, we thought that the possibility of some overlooked information should be considered.

776

#### 777 **4.2. Supporting discussion 2: research situations of COVID-19-related thrombosis**

778 Historically, thrombosis research has a relatively long history in medicine. In the 19th  
779 century, Virchow's triad, named after Rudolf Virchow (1821-1902), had already been established.  
780 Virchow's triad contains three statements on the element of thrombus formation that is  
781 "Hypercoagulability," "Stasis," and "Endothelial injury"<sup>18,86</sup>. In 1948, when molecular biology was  
782 still in its early days (please imagine the DNA double helix model was proposed in 1953), blood  
783 coagulation factor 13 was already identified. So, the number of unsolved problems in coagulation  
784 physiology was relatively small than in immunology and neuroscience.

785 Nevertheless, it had already been known that forming microthrombus as a defense  
786 mechanism to trap pathogens such as viruses locally and disseminated intravascular coagulation  
787 (DIC) caused by confusion of the mechanism. However, in the above classical research field, some  
788 review articles informed that the problem of COVID-19 was not only a quantitatively challenging  
789 problem within the meaning that there were many infected patients, but also a problem that felt like a  
790 new experience to researchers as a reaction of the human body to infectious diseases. For example,  
791 Barrett et al mentioned that "Although DIC is a long-studied phenomenon, there has never been a  
792 disease like COVID-19 that so consistently causes thrombotic DIC in large numbers of patients"<sup>19</sup> as  
793 a comment on the interim guidance from the International Society for Thrombosis and Hemostasis<sup>20</sup>.

794 Additionally, in articles related to COVID-19, Callaway et al mentioned in the title "Six  
795 months of coronavirus: the mysteries scientists are still racing to solve"<sup>21</sup>. Moreover, Tal et al  
796 mentioned in the title "Venous Thromboembolism Complicated With COVID-19: What Do We  
797 Know So Far?"<sup>22</sup>, and Marietta et al mentioned in the title "COVID-19, coagulopathy and venous  
798 thromboembolism: more questions than answers"<sup>23</sup>. Thus, the words "mystery," "complexity," and  
799 "more questions than answers" appeared in the titles of these recent articles.

800 Indeed, the new coronavirus is a novel pathogen for humans, but there has been no change in  
801 the human body since the 19th century. Therefore, the above situation should also be suspected of  
802 some overlooked information, as in the case of the traveler's thrombosis.

803 This situation was similar to that of the traveler's thrombosis, and we started this analysis  
804 with the inspiration from the famous mathematician Polya who stated that solving a similar problem  
805 helped us solve a more complex problem<sup>87</sup>.

806

#### 807 **4.3. Supporting discussion 3: two high-risk periods and two types of high-risk groups?**

808 We obtained uniform results from two analyses in different datasets (Analysis 1A: 7.1 hours  
809 and 11.8 hours, Analysis 1B: 9.2 hours and 12.1 hours), gathered by Chandra et al<sup>10</sup> (**Fig. 3, b**) and  
810 Philbrick et al<sup>7</sup> (**Fig. S3, b**). Also, there were two peaks at the time, around 7 hours and 12 hours, in  
811 the data reported by Clérel and Caillard (**Fig. S4**). Therefore, we suspect two risk periods for the onset  
812 of thrombosis.

813 Also, we hypothesized two types of the group with a high risk of thromboses, such as high-  
814 risk group A and high-risk group B (risk of A > risk of B). Thus, high-risk group A develops PE in  
815 the first high-risk period. In contrast, high-risk group B passes the first risk time zone and develops  
816 DVT on a long flight (10 hours or more). Although this story did not explain why some high-risk  
817 group A present no DVT, considering a research report on the “factor V Leiden paradox,” which  
818 reported the pathophysiology of PE and DVT was different<sup>44</sup>, the pathophysiology of PE and DVT  
819 might be different in travel as well.

820 Additionally, in the result of the correlogram, the interval between the wave's peaks was  
821 about 18.35 hours, but the valley point was not the midpoint between the peaks. The length from the  
822 first peak (left peak) to the valley (minimum) and from the valley to the next peak (right peak) was  
823 10.73 hours and 7.61 hours, respectively (**Fig. S4**). This result may suggest complex periodic  
824 fluctuations. Those results matched the discussion on the above high-risk period, although this is a  
825 discussion about the same data because we use the same data for analysis by using a correlogram.

826 On the other hand, the time point divided equally between the two peaks (18.35 hours) was  
827 9.18 hours, close to eight hours. This “eight hour” has been a component of the principle of “8 hours  
828 sleep, 8 hours work, 8 hours free time” since the labor movement in Chicago, USA, 1886, in human  
829 society. Also, the operation of the 8-hour principle is related to circadian rhythms (e.g., 8 hours of  
830 work during the day and 8 hours of sleep at night).

831 Also, the effects of circadian rhythms on the cardiovascular system are already known (e.g.,  
832 morning surge). Therefore, it seems that the circadian rhythm underlies the periodic fluctuations  
833 observed on the correlogram, which has undergone some modification. Perhaps the circadian rhythm  
834 of the departure point and the circadian rhythm of the arrival point (Paris) are mixed, resulting in  
835 complex periodic fluctuations.

836

837

#### 838 **4.4. Supporting discussion 4: for more discussion on Traveler's thrombosis in Women and Men**

##### 839 **1) Cyclic patterns newly founded in this research and OC**

840 Despite the exposures in Cannegieter et al being more complex (air travel, train, bus, and car  
841 trip)<sup>3</sup> than Kelman et al (only air travel)<sup>28</sup>, the wave in the data reported by Cannegieter et al. was  
842 clear, but the wave in the data reported by Kelman et al was not clear.

843 The data reported by Cannegieter et al contained many car trips (air travel, train, bus, and  
844 car trip). These cars might be honeymoon cars.

845 Kelman et al described that although the risk increased within 2 to 4 weeks of flight (hazard  
846 period), the risk was low after the period because travelers were healthier than the average of a group  
847 (healthy traveler effect)<sup>28</sup>. Also, Rothman mentioned the “persistence of travel-related risk” and  
848 “spline regression”<sup>4</sup>. They might realize the position around 3-4 weeks as a valley between two  
849 distributions (honestly, we thought the same as them before we learned the cyclic patterns by  
850 spending long-time severe observations and non-linear regression analysis).

851

##### 852 **2) The difference in the cyclic patterns and HRT**

853 We found a slowdown of the increase of thrombosis onset at Paris airports in 1998, the year  
854 of HERS result was issued (**Fig. S5**). Also, our trend analysis showed that the number of literature on  
855 thrombosis decreased since around 2000 (**Fig. S6**). Moreover, our merged data from four  
856 studies<sup>26,27,33,34</sup> on PE from the 1970s to the 2000s showed that the rate of women was most  
857 pronounced during the late 1990s (**Table S3**).

858           Although the existence of the women patients not “menopausal” stage women (40s to 50s)  
859 but among around 70-75 years of age seems to disagree with HRT use (**Fig. S4, d, & Fig. S8, d**), the  
860 subjects of the WHI study were “postmenopausal” women (age 50-79) for prophylactic use for  
861 cardiovascular problems.

862

### 863 **3) Men’s life stage and travel related psychological stress**

864           Every four studies<sup>26,27,33,34</sup> showed inconsistent results (correlated or inversely correlated).  
865 This situation seems to be the same as the parable of “blind men and an elephant.” Considering the  
866 correlation between age and the risk of thrombosis, the above phenomena may be one of the causes of  
867 controversial discussions. Also, It seems worth noting that Grant commented on specific age group  
868 (50-59) in a rapid response to Kelman et al’s work (electronic comment on BMJ website)<sup>88</sup>, although  
869 the word was related to the context of OC and HRT.

870

### 871 **4) Changing the framework of the disease concept of “travel-related thrombosis.”**

872           Although the results of a meta-regression analysis (Chandra et al’s result<sup>10</sup> and our results of  
873 S-curve fittings) showing that the risk of thrombosis increases with travel duration have seemed to  
874 support the in-flight environment theory, the possibility may exist that what essentially correlates with  
875 the risk of thrombosis is “increased health risks with aging” or “psychological stress associated with  
876 rising job titles,” since men’s data shows an increase in travel time with age. Nemeth et al  
877 experimentally showed that psychological stress (fear caused by a horror movie) was associated with  
878 a rise in blood coagulant factor VIII<sup>89</sup>.

879

### 880 **5) Controversial discussions and overlooked patterns**

881           Recently, we have thought that the concept of “medical research test” or “inspection of  
882 medical data analysis” can be developed analogically as an extension of the medical inspection,  
883 including laboratory tests for each patient for each patient. Like medical inspection using equipment,  
884 detecting overlaid hyperbolic shape patterns may be a tool or marker of some overlooked  
885 information (**Fig. S1, e**).



886

#### 887 **4.5. Supporting discussion 5: linear regression analysis**

888 Drawing regression line to the scatter plot seems inappropriate because it is not acceptable  
889 to suggest the validity of applying a linear regression analysis only by the significant result of a test  
890 for regression coefficient. Also, a statistical test result generally becomes significant more easily as  
891 the sample size increases.

892 Additionally, we found unrecognized patterns during the data review process in a figure  
893 reported by Guo et al<sup>37</sup>, which showed a relationship between N-terminal pro-brain sodium diuretic  
894 peptide (NT-proBNP) and Troponin T (TnT). There were three clusters of subgroup patterns, and the  
895 third subgroup pattern was similar to the pattern of ST-elevating myocardial infarction in the figure  
896 report by Budnik et al (*Int J Cardiol.* 2016;15(219), Fig. 1)<sup>38</sup>. Also, this tilted parabola pattern has  
897 already appeared in Sugawa et al (*Sci Rep.* 2018;8(1), Figure 1)<sup>41</sup> and Satyan et al (*Am J Kidney Dis.*  
898 2007;50(6), Figure 1)<sup>40</sup>. These indicated that this pattern was reproducible.

899 However, those patterns were not recognized by each author. In another paper, Sugawa  
900 divided the 2-dimensional scatters plot into four areas by crossed axis and compared each area (*J Med*  
901 *Diagn Meth.* 2017;6(2), Figure 1)<sup>90</sup>. Therefore, Sugawa may have noticed the existence of a parabola,  
902 although he did not entirely recognize it.

903 As a cause of the above-confused situation, it is conceived that many researchers applied  
904 linear regression analysis inappropriately by focusing only on statistical significance, such as “p <  
905 0.001”.

906 To explain the misuse of linear regression analysis, we made virtual data using random  
907 number generation in spreadsheet software (**see Supporting information: Method details**). The  
908 following are estimated equations by the regression analysis and the statistical test result performed  
909 using a program on the statistical analysis software R platform (**Fig. S13, f**).

910 In panel f of **Fig. S13**, the formula for the regression line is shown below. Also, the  
911 estimated equation is expressed in the following line. The test result is significant due to a large  
912 sample (n = 100).

913

$$y = \beta_0 + \beta_1 x$$

914 
$$y = 0.7280^{**} + 0.8313^{***}x$$

915 significance codes: '\*\*\*' 0.001 '\*\*' 0.01 '\*' 0.05 '.' 0.1 ' ' 1

916 In this panel, the formula for the regression curve is shown below. Also, the estimated  
917 equation is expressed in the next line.

918 
$$y = \beta_0 + \beta_1x + \beta_2x^2 + \beta_3x^3 + \beta_4x^4$$

919 
$$y = 2.14594^{***} - 0.54052x + 0.49655x^2 - 0.42523 \cdot x^3 + 0.10680^{***}x^4$$

920 significance codes: '\*\*\*' 0.001 '\*\*' 0.01 '\*' 0.05 '.' 0.1 ' ' 1

921 A statistical test on a coefficient of line or curve is helpful for variable selection if there are  
922 many variables and visual confirmation is impossible (e.g., multivariate regression analysis).

923 However, significance does not indicate judgment to remove coefficients, but the p-value relatively  
924 shows the importance of the coefficients. In this equation, although the p-value indicates non-  
925 significant, excluding coefficients (“-0.54052”, “0.49655”, and “-0.42523”) results in a poor curve  
926 fitting the data (**dashed line in Fig. S13, f**).

927

## 928 5. SI References

929 51. Bureau of Labor Statistics USDo, Labor. The Economics Daily, Men's earnings at peak at  
930 age 45-54. <https://www.bls.gov/opub/ted/1999/jul/wk3/art05.htm>

931 52. Cao J, Hu X, Cheng W, Yu L, Tu WJ, Liu Q. Clinical features and short-term outcomes of  
932 18 patients with corona virus disease 2019 in intensive care unit. *Intensive Care Med.* 05  
933 2020;46(5):851-853. doi:10.1007/s00134-020-05987-7

934 53. Deng Y, Liu W, Liu K, et al. Clinical characteristics of fatal and recovered cases of  
935 coronavirus disease 2019 in Wuhan, China: a retrospective study. *Chin Med J (Engl)*. Jun  
936 2020;133(11):1261-1267. doi:10.1097/CM9.0000000000000824

937 54. Guan WJ, Ni ZY, Hu Y, et al. Clinical Characteristics of Coronavirus Disease 2019 in  
938 China. *N Engl J Med.* 04 2020;382(18):1708-1720. doi:10.1056/NEJMoa2002032

939 55. Wang D, Hu B, Hu C, et al. Clinical Characteristics of 138 Hospitalized Patients With 2019  
940 Novel Coronavirus-Infected Pneumonia in Wuhan, China. *JAMA.* 03 2020;323(11):1061-  
941 1069. doi:10.1001/jama.2020.1585

- 942 56. Wang L, He W, Yu X, et al. Coronavirus disease 2019 in elderly patients: Characteristics  
943 and prognostic factors based on 4-week follow-up. *J Infect.* 06 2020;80(6):639-645.  
944 doi:10.1016/j.jinf.2020.03.019
- 945 57. Wu C, Chen X, Cai Y, et al. Risk Factors Associated With Acute Respiratory Distress  
946 Syndrome and Death in Patients With Coronavirus Disease 2019 Pneumonia in Wuhan,  
947 China. *JAMA Intern Med.* 07 2020;180(7):934-943. doi:10.1001/jamainternmed.2020.0994
- 948 58. Zhou F, Yu T, Du R, et al. Clinical course and risk factors for mortality of adult inpatients  
949 with COVID-19 in Wuhan, China: a retrospective cohort study. *Lancet.* 03  
950 2020;395(10229):1054-1062. doi:10.1016/S0140-6736(20)30566-3
- 951 59. Wikipedia contributors. Hooke's law - Wikipedia.  
952 [https://en.wikipedia.org/wiki/Hooke%27s\\_law](https://en.wikipedia.org/wiki/Hooke%27s_law)
- 953 60. Belcaro G, Geroulakos G, Nicolaides AN, Myers KA, Winford M. Venous  
954 thromboembolism from air travel: the LONFLIT study. *Angiology.* Jun 2001;52(6):369-74.  
955 doi:10.1177/000331970105200601
- 956 61. Lapostolle F, Surget V, Borron SW, et al. Severe pulmonary embolism associated with air  
957 travel. *N Engl J Med.* Sep 13 2001;345(11):779-83. doi:10.1056/NEJMoa010378
- 958 62. Schwarz T, Langenberg K, Oettler W, et al. Deep vein and isolated calf muscle vein  
959 thrombosis following long-haul flights: pilot study. *Blood Coagul Fibrinolysis.* Dec  
960 2002;13(8):755-7. doi:10.1097/00001721-200212000-00013
- 961 63. Jacobson BF, Münster M, Smith A, et al. The BEST study--a prospective study to compare  
962 business class versus economy class air travel as a cause of thrombosis. *S Afr Med J.* Jul  
963 2003;93(7):522-8.
- 964 64. Hughes RJ, Hopkins RJ, Hill S, et al. Frequency of venous thromboembolism in low to  
965 moderate risk long distance air travellers: the New Zealand Air Traveller's Thrombosis  
966 (NZATT) study. *Lancet.* Dec 20 2003;362(9401):2039-44. doi:10.1016/s0140-  
967 6736(03)15097-0

- 968 65. Pérez-Rodríguez E, Jiménez D, Díaz G, et al. Incidence of air travel-related pulmonary  
969 embolism at the Madrid-Barajas airport. *Arch Intern Med*. 2003 Dec 8-22  
970 2003;163(22):2766-70. doi:10.1001/archinte.163.22.2766
- 971 66. Schwarz T, Siegert G, Oettler W, et al. Venous thrombosis after long-haul flights. *Arch*  
972 *Intern Med*. 2003 Dec 8-22 2003;163(22):2759-64. doi:10.1001/archinte.163.22.2759
- 973 67. Gajic O, Warner DO, Decker PA, Rana R, Bourke DL, Sprung J. Long-haul air travel  
974 before major surgery: a prescription for thromboembolism? *Mayo Clin Proc*. Jun  
975 2005;80(6):728-31. doi:10.1016/S0025-6196(11)61525-5
- 976 68. Yuan M, Yin W, Tao Z, Tan W, Hu Y. Association of radiologic findings with mortality of  
977 patients infected with 2019 novel coronavirus in Wuhan, China. *PLoS One*.  
978 2020;15(3):e0230548. doi:10.1371/journal.pone.0230548
- 979 69. Bhatraju PK, Ghassemieh BJ, Nichols M, et al. Covid-19 in Critically Ill Patients in the  
980 Seattle Region - Case Series. *N Engl J Med*. 05 2020;382(21):2012-2022.  
981 doi:10.1056/NEJMoa2004500
- 982 70. CDC COVID-19 Response Team. Preliminary Estimates of the Prevalence of Selected  
983 Underlying Health Conditions Among Patients with Coronavirus Disease 2019 - United  
984 States, February 12-March 28, 2020. *MMWR Morb Mortal Wkly Rep*. Apr 2020;69(13):382-  
985 386. doi:10.15585/mmwr.mm6913e2
- 986 71. CDC COVID-19 Response Team. Severe Outcomes Among Patients with Coronavirus  
987 Disease 2019 (COVID-19) - United States, February 12-March 16, 2020. *MMWR Morb*  
988 *Mortal Wkly Rep*. Mar 2020;69(12):343-346. doi:10.15585/mmwr.mm6912e2
- 989 72. Chen J, Qi T, Liu L, et al. Clinical progression of patients with COVID-19 in Shanghai,  
990 China. *J Infect*. 05 2020;80(5):e1-e6. doi:10.1016/j.jinf.2020.03.004
- 991 73. Chen T, Wu D, Chen H, et al. Clinical characteristics of 113 deceased patients with  
992 coronavirus disease 2019: retrospective study. *BMJ*. 03 2020;368:m1091.  
993 doi:10.1136/bmj.m1091

- 994 74. Cheng Y, Luo R, Wang K, et al. Kidney disease is associated with in-hospital death of  
995 patients with COVID-19. *Kidney Int.* 05 2020;97(5):829-838.  
996 doi:10.1016/j.kint.2020.03.005
- 997 75. Huang C, Wang Y, Li X, et al. Clinical features of patients infected with 2019 novel  
998 coronavirus in Wuhan, China. *Lancet.* 02 2020;395(10223):497-506. doi:10.1016/S0140-  
999 6736(20)30183-5
- 1000 76. Lian J, Jin X, Hao S, et al. Analysis of Epidemiological and Clinical Features in Older  
1001 Patients With Coronavirus Disease 2019 (COVID-19) Outside Wuhan. *Clin Infect Dis.* 07  
1002 2020;71(15):740-747. doi:10.1093/cid/ciaa242
- 1003 77. Liang W, Guan W, Chen R, et al. Cancer patients in SARS-CoV-2 infection: a nationwide  
1004 analysis in China. *Lancet Oncol.* 03 2020;21(3):335-337. doi:10.1016/S1470-  
1005 2045(20)30096-6
- 1006 78. Onder G, Rezza G, Brusaferro S. Case-Fatality Rate and Characteristics of Patients Dying  
1007 in Relation to COVID-19 in Italy. *JAMA.* May 2020;323(18):1775-1776.  
1008 doi:10.1001/jama.2020.4683
- 1009 79. Ruan Q, Yang K, Wang W, Jiang L, Song J. Clinical predictors of mortality due to COVID-  
1010 19 based on an analysis of data of 150 patients from Wuhan, China. *Intensive Care Med.* 05  
1011 2020;46(5):846-848. doi:10.1007/s00134-020-05991-x
- 1012 80. Shi S, Qin M, Shen B, et al. Association of Cardiac Injury With Mortality in Hospitalized  
1013 Patients With COVID-19 in Wuhan, China. *JAMA Cardiol.* 07 2020;5(7):802-810.  
1014 doi:10.1001/jamacardio.2020.0950
- 1015 81. Tang N, Li D, Wang X, Sun Z. Abnormal coagulation parameters are associated with poor  
1016 prognosis in patients with novel coronavirus pneumonia. *J Thromb Haemost.* 04  
1017 2020;18(4):844-847. doi:10.1111/jth.14768
- 1018 82. The Novel Coronavirus Pneumonia Emergency Response Epidemiology Team. The  
1019 Epidemiological Characteristics of an Outbreak of 2019 Novel Coronavirus Diseases  
1020 (COVID-19) — China, 2020. *China CDC Weekly.* 2020;2(8):113-122.  
1021 doi:https://doi.org/10.46234/ccdcw2020.032

- 1022 83. Yang X, Yu Y, Xu J, et al. Clinical course and outcomes of critically ill patients with  
1023 SARS-CoV-2 pneumonia in Wuhan, China: a single-centered, retrospective, observational  
1024 study. *Lancet Respir Med*. 05 2020;8(5):475-481. doi:10.1016/S2213-2600(20)30079-5
- 1025 84. Zhang L, Zhu F, Xie L, et al. Clinical characteristics of COVID-19-infected cancer patients:  
1026 a retrospective case study in three hospitals within Wuhan, China. *Ann Oncol*. 07  
1027 2020;31(7):894-901. doi:10.1016/j.annonc.2020.03.296
- 1028 85. Timmes FX. Fitting to Conic Sections. [http://cococubed.asu.edu/code\\_pages/conic.shtml](http://cococubed.asu.edu/code_pages/conic.shtml)
- 1029 86. Kushner A, West WP, Pillarisetty LS. Virchow Triad. In: StatPearls [Internet]. 2021.
- 1030 87. Polya G. *How to Solve It: A New Aspect of Mathematical Method (Princeton Science*  
1031 *Library)*. Princeton University Press; 1957.
- 1032 88. Grant E. Sex ratio not given: rapid response (electronic comment) on "'Deep vein  
1033 thrombosis and air travel: record linkage study' BMJ 2003;327:1072". 2003.
- 1034 89. Nemeth B, Scheres LJ, Lijfering WM, Rosendaal FR. Bloodcurdling movies and measures  
1035 of coagulation: Fear Factor crossover trial. *BMJ*. Dec 16 2015;351:h6367.  
1036 doi:10.1136/bmj.h6367
- 1037 90. Sugawa S. Significance of Screening the General Population for Potential Cardiovascular  
1038 Diseases with a Combination Assay of B-type Natriuretic Peptide and High Sensitive  
1039 Troponin I. *J Med Diagn Meth*. 2017;6(2)
- 1040
